# Supplementary material for: BACH1-induced ferroptosis drives lymphatic metastasis by repressing the biosynthesis of monounsaturated fatty acids
Source: PubMed Central journal article supplement (PMC9860034; doi:10.1038/s41419-023-05571-z), 2023-01-20

Figure 2A:

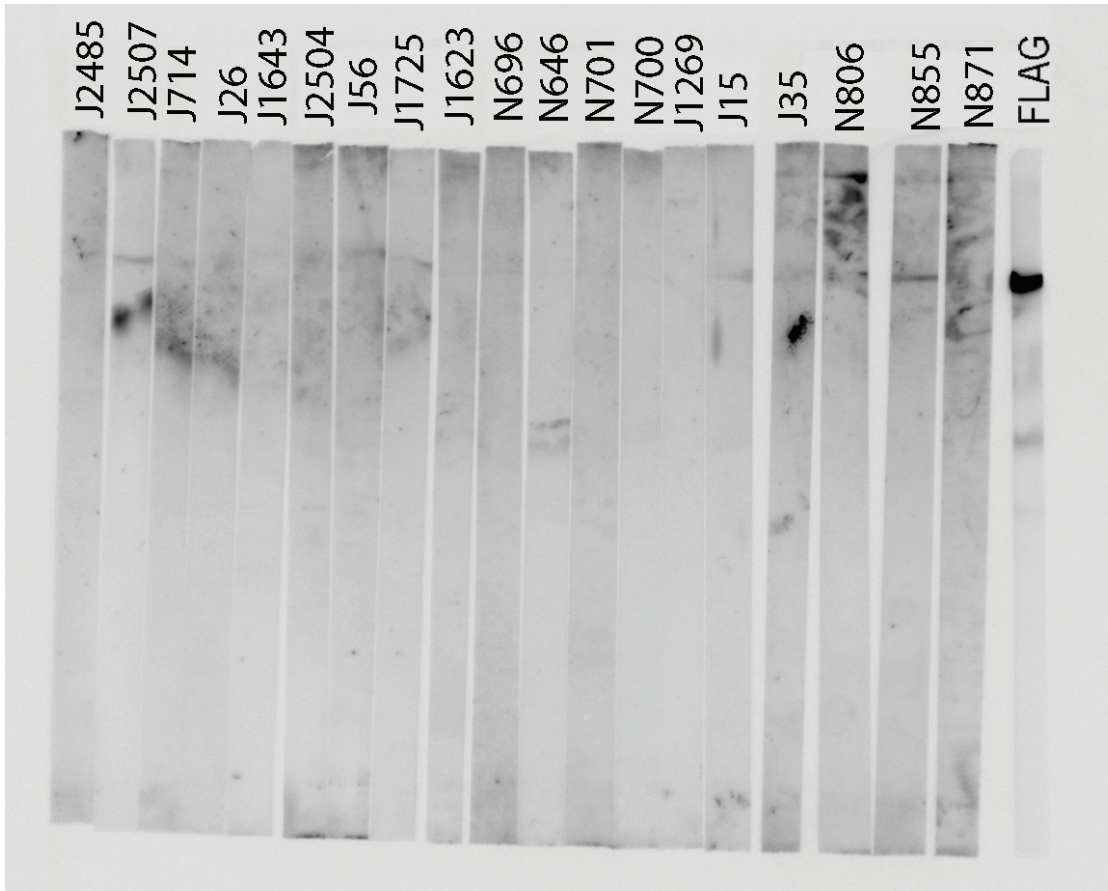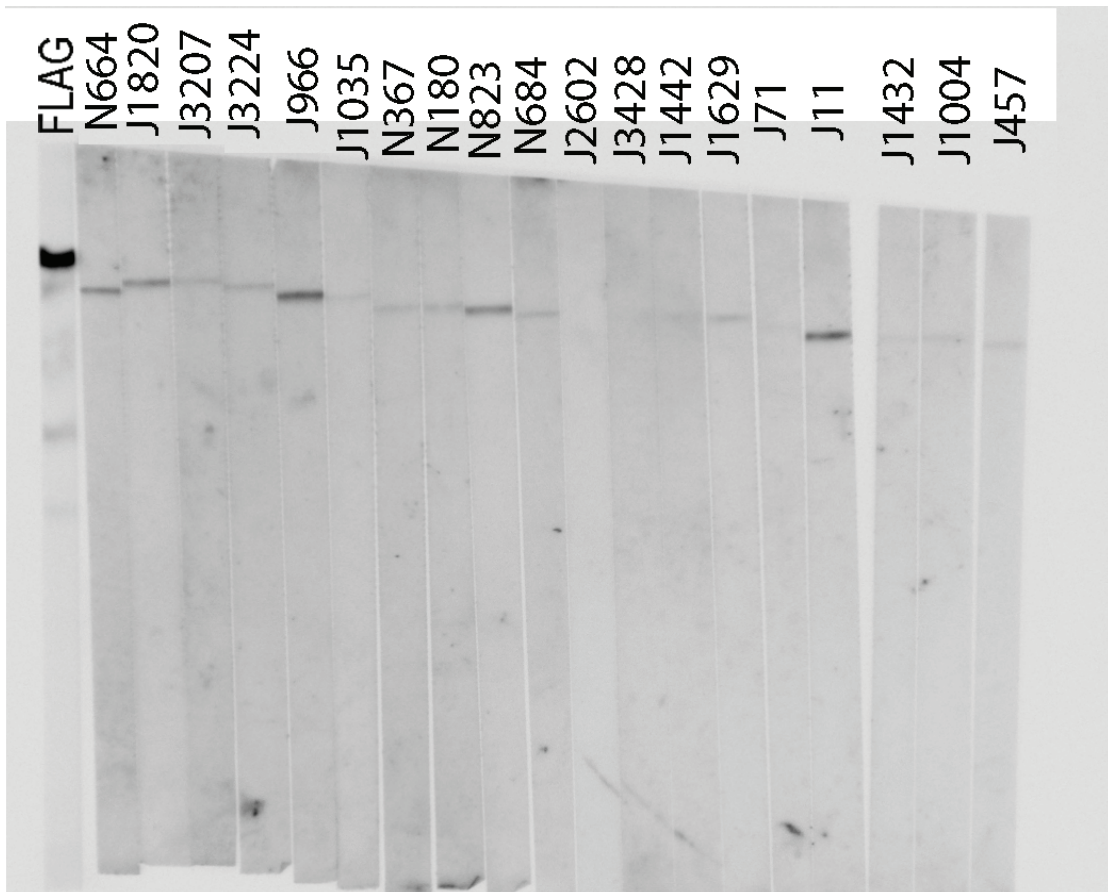

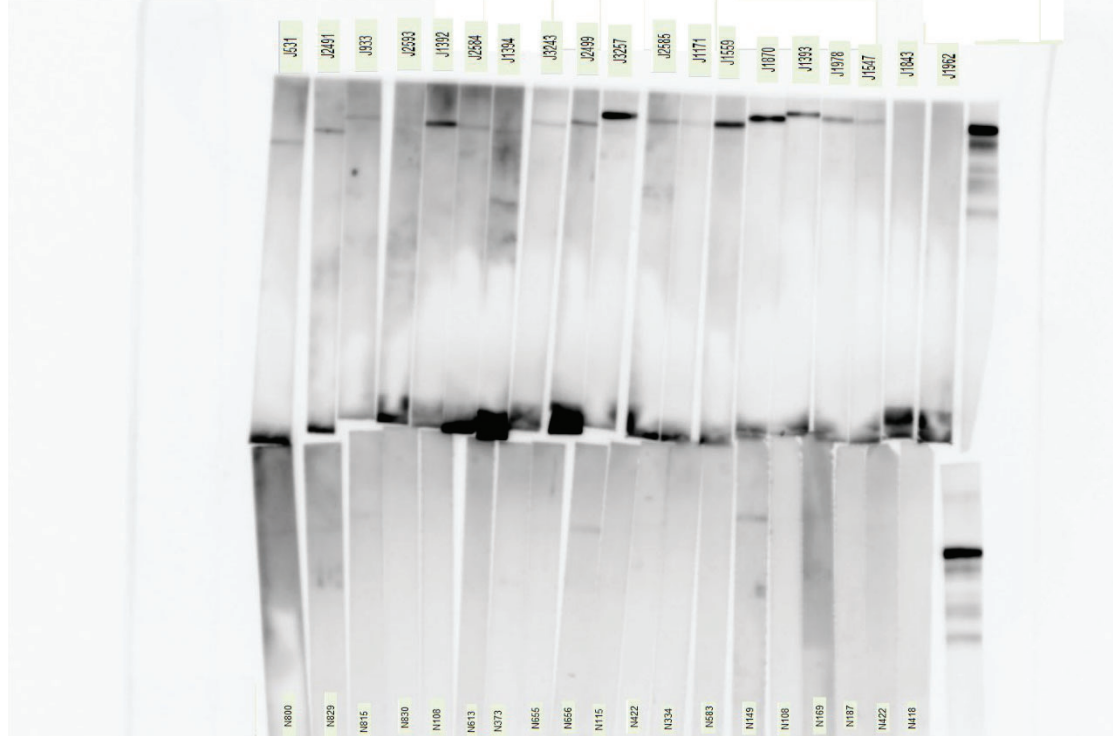

**J1797**  
**J1844**  
**J1856**  
**J1848**  
**J1801**  
**J1977**  
**J1276**  
**J1975**  
**J1969**  
**J1800**  
**N641**  
**N629**  
**N695**  
**N837**  
**N698**  
**N267**  
**N81**  
**N634**  
**N154**  
**N827**  
**FLAG**

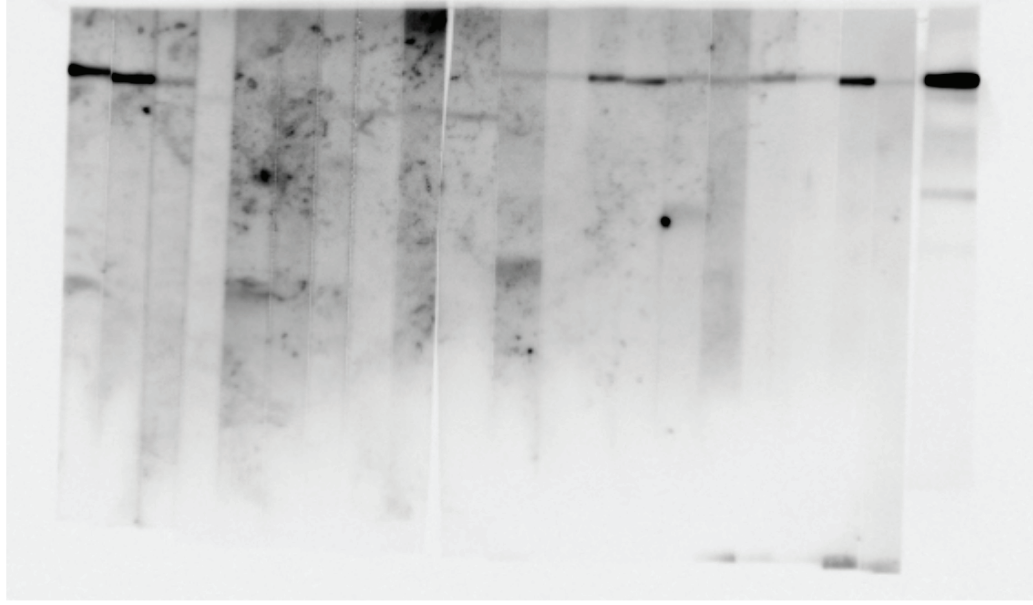

J1827  
J1471  
J1879  
J1652  
J942  
J418  
J2590  
J2333  
J2483  
J2600  
N554  
N183  
N370  
N189  
N369  
N230  
N559  
N555  
N885  
N814  
FLAG

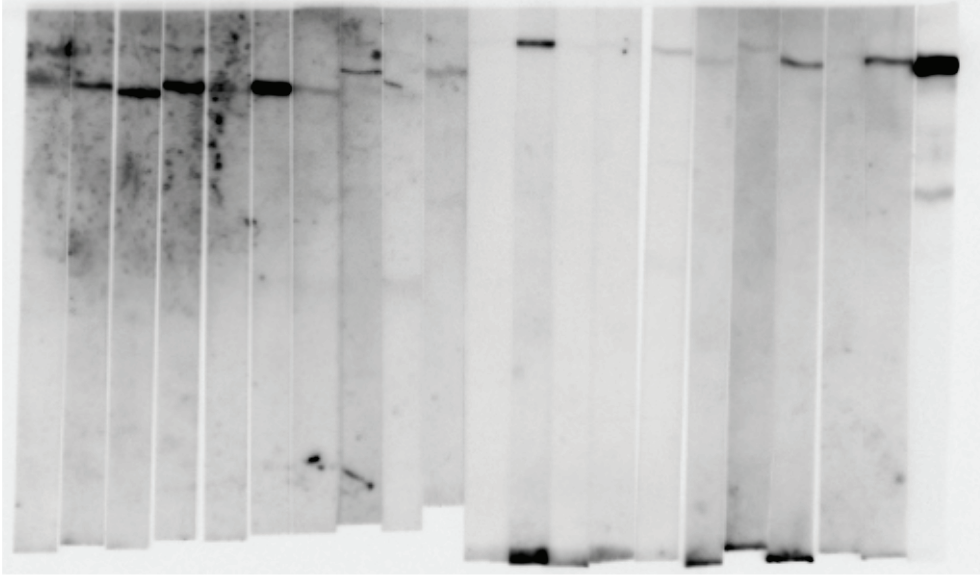

J1246  
J232  
J1433  
J322  
J1739  
J1793  
J1604  
J2485  
J2507  
J714  
J26  
J1643  
J2504  
J56  
J1725  
J1623  
J1269  
J15  
J35  
FLAG

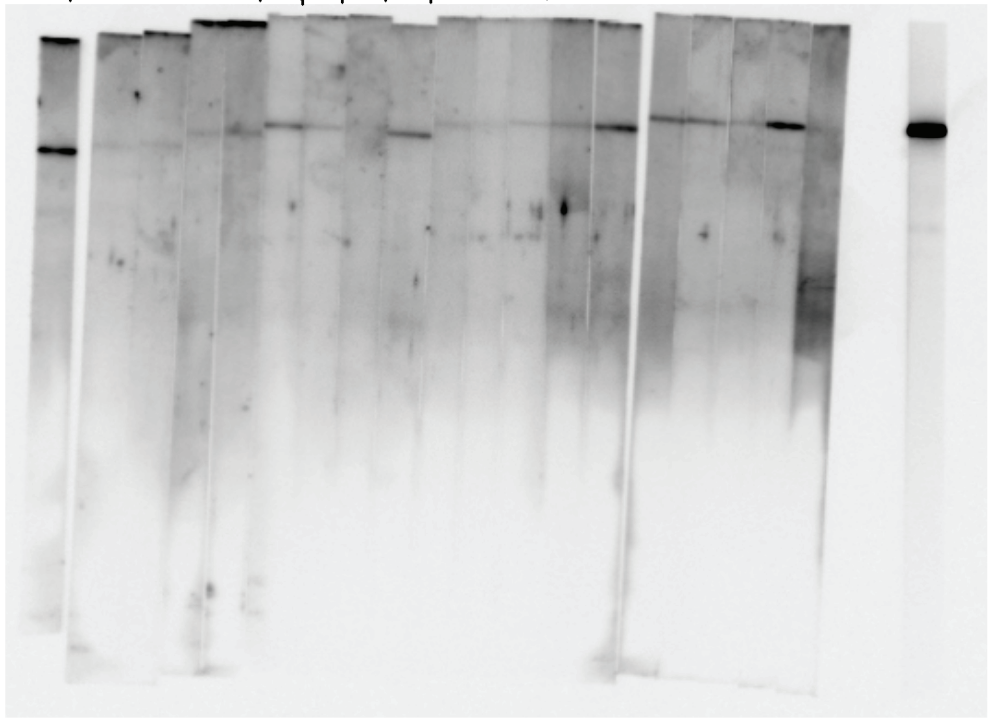

J457  
J1004  
J1432  
J1394  
J2593  
J933  
J2491  
J531  
J1820  
J3207  
J3224  
J966  
J1035  
J2602  
J2428  
J1442  
J1629  
J71  
J11  
FLAG  
FLAG

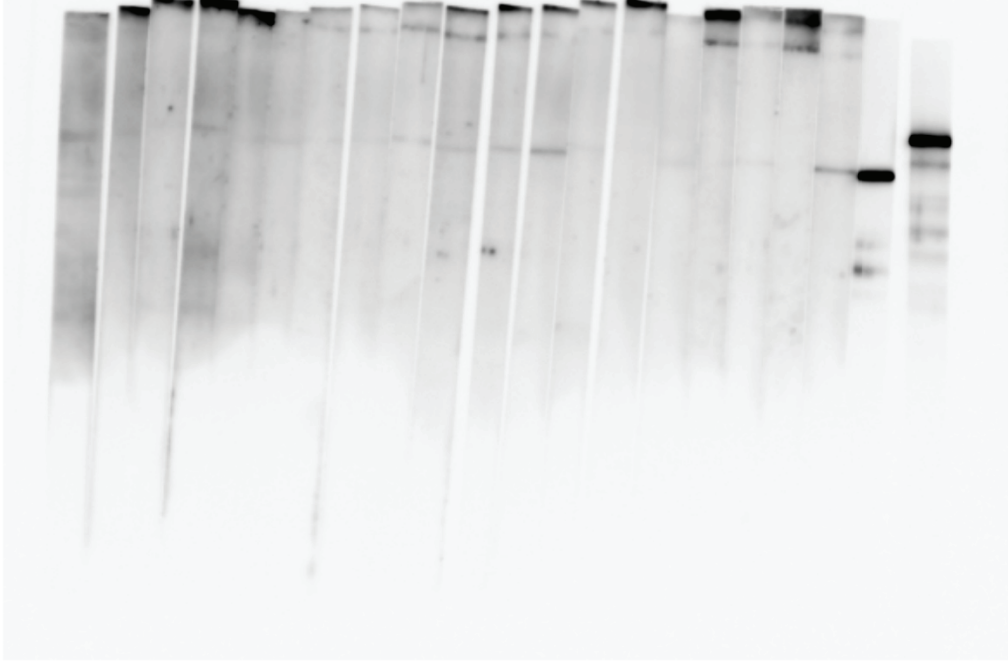

J1856  
J1848  
J1801  
J1977  
J1276  
J1975  
J1969  
J1800  
J942  
J2590  
J2333  
J2483  
J2600  
J2584  
J3243  
J1171  
J1843  
J1962  
J1978  
J2585  
FLAG  
FLAG

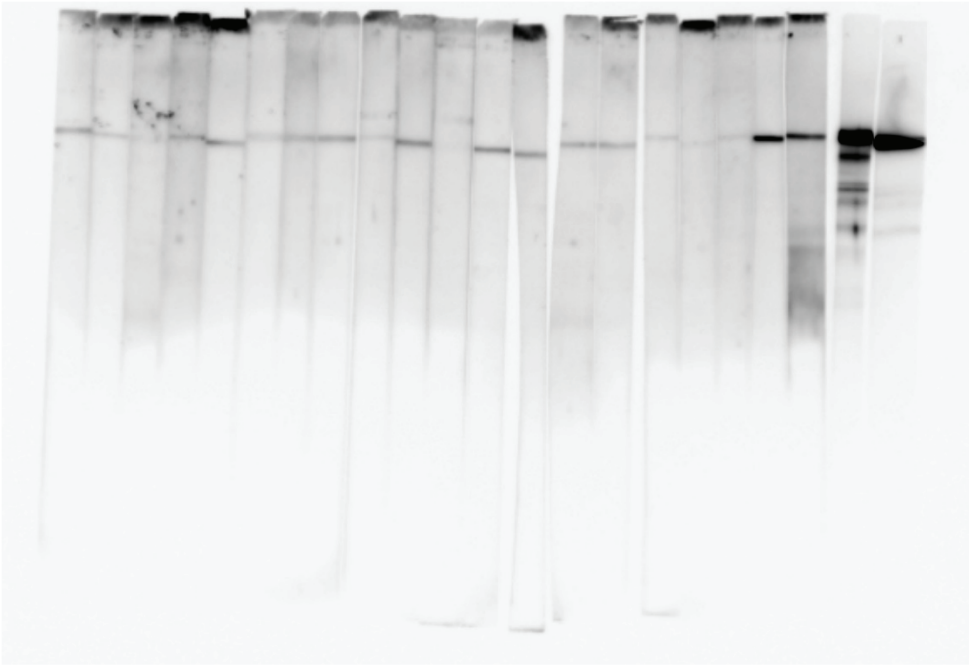

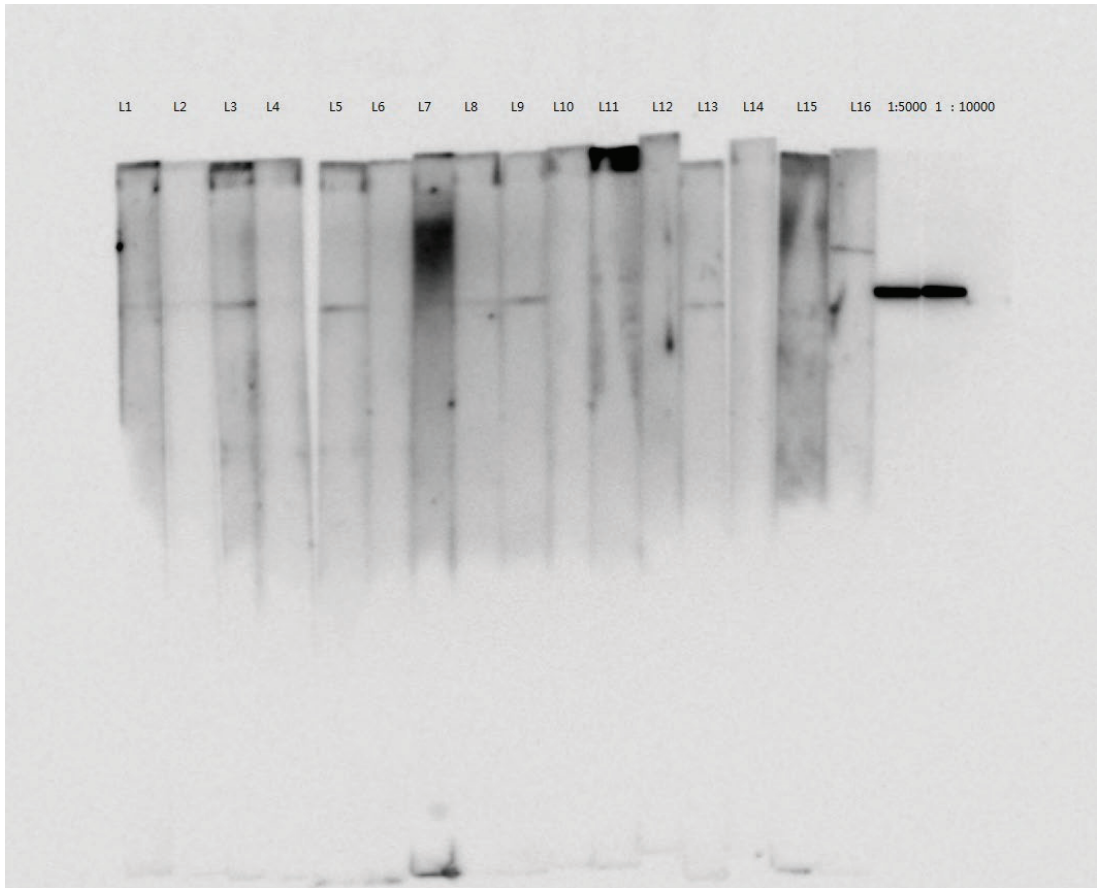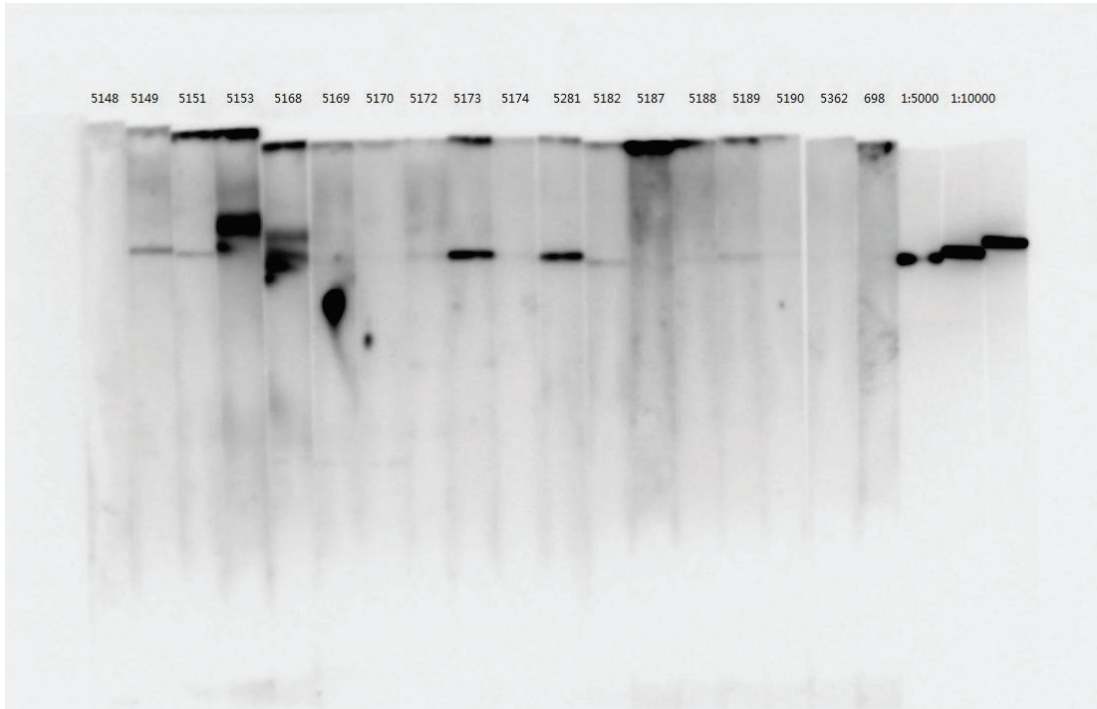

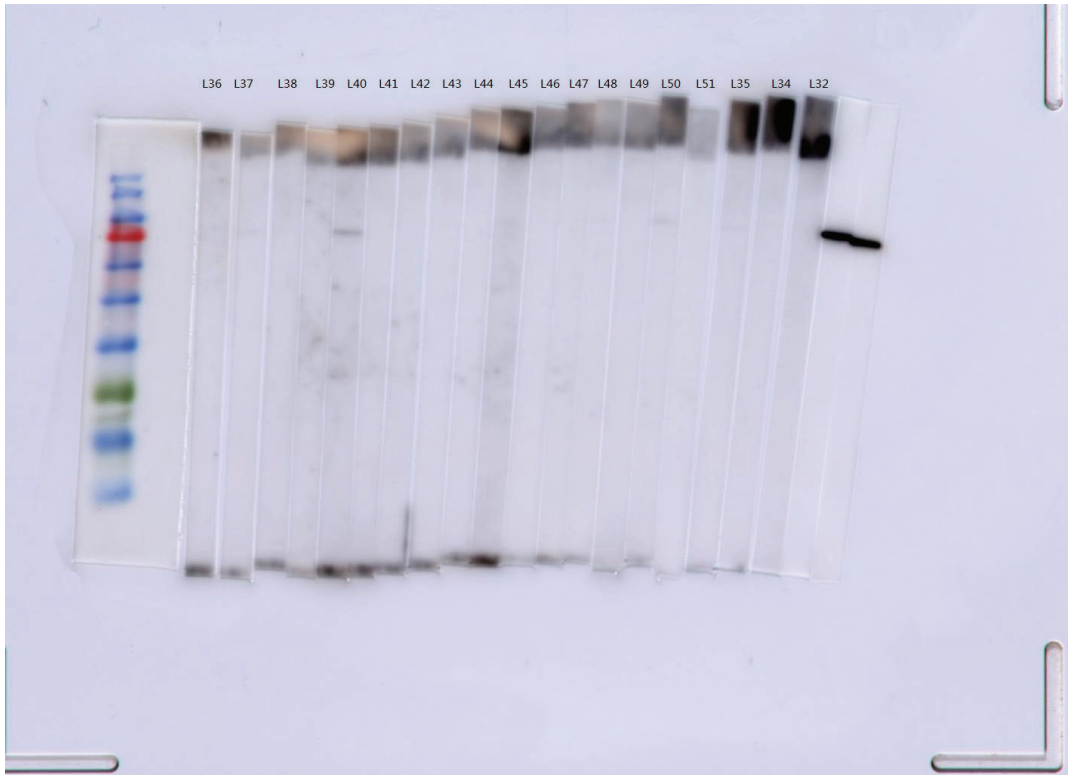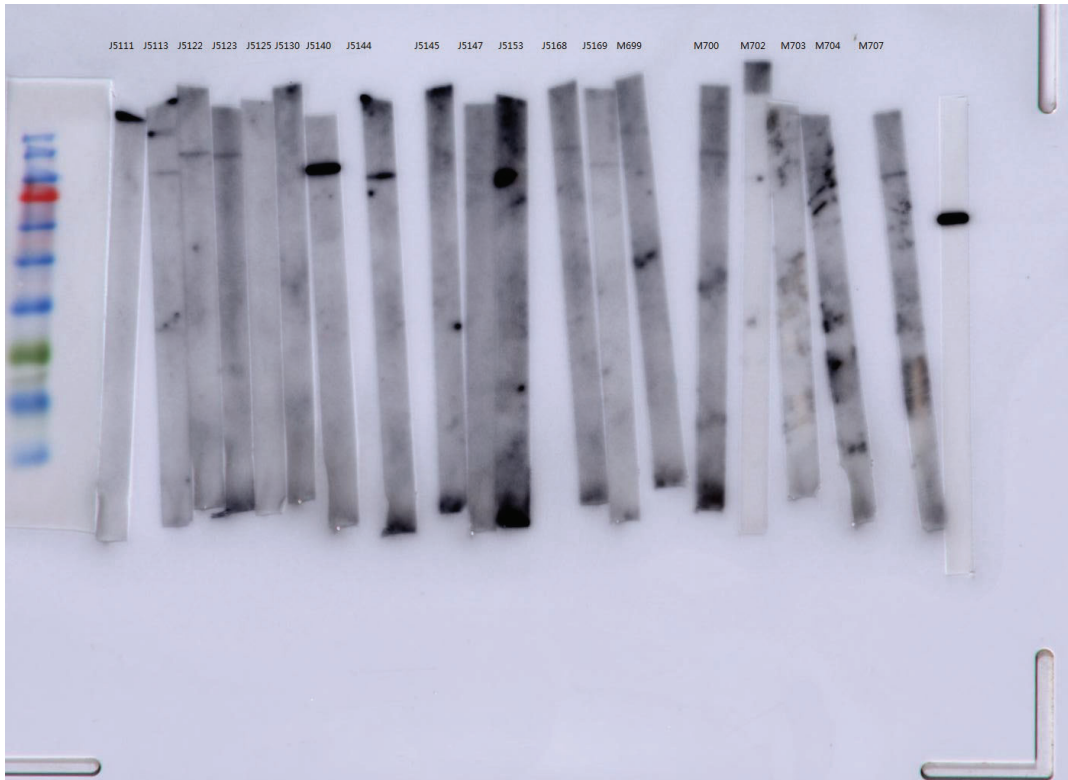

FLAG  
J1270  
J1224  
J797  
J717  
J545  
J481  
J5277  
J5275  
J5274  
J5273  
J5272  
J5271  
J5270  
J5269  
J5265  
J5264  
J5249  
J5248  
J5247  
J5244

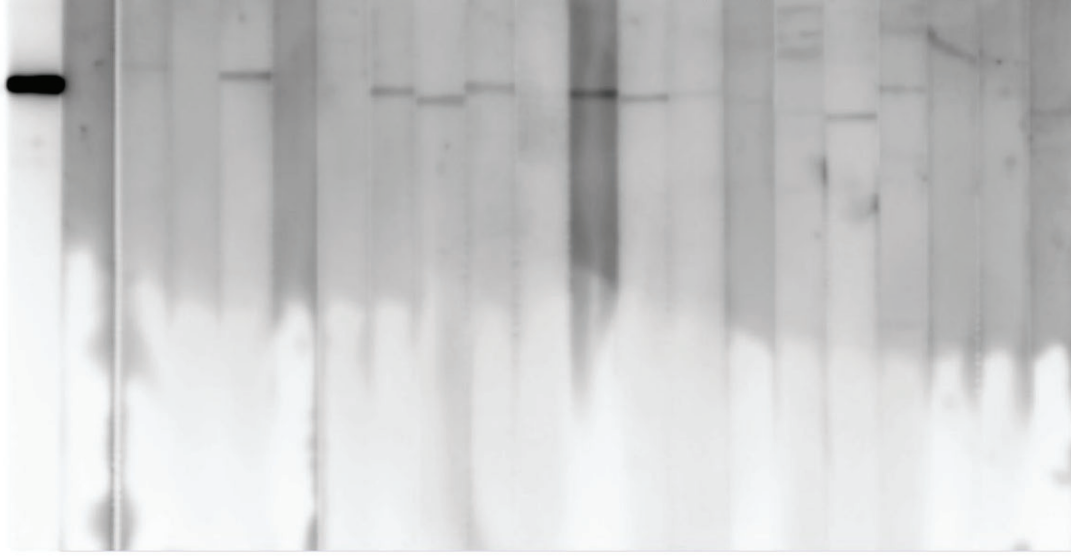

FLAG  
FLAG  
L31  
L30  
L29  
L28  
L27  
L26  
L25  
L24  
L23  
L22  
L21  
L20  
L19  
L18  
L17  
M717  
M716  
M714  
M713  
M708

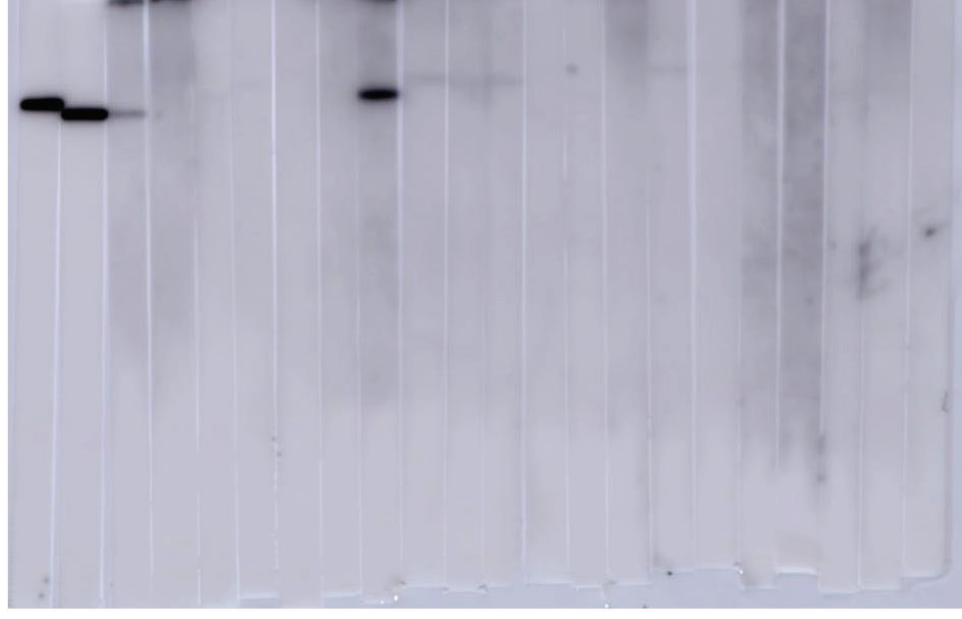

TS150  
TS151  
TS152  
TS153  
TS154  
TS155  
TS156  
TS157  
TS158  
TS159  
TS160  
TS161  
TS162  
TS163  
TS164  
TS165  
TS166  
TS167  
TS168  
TS169  
FLAG

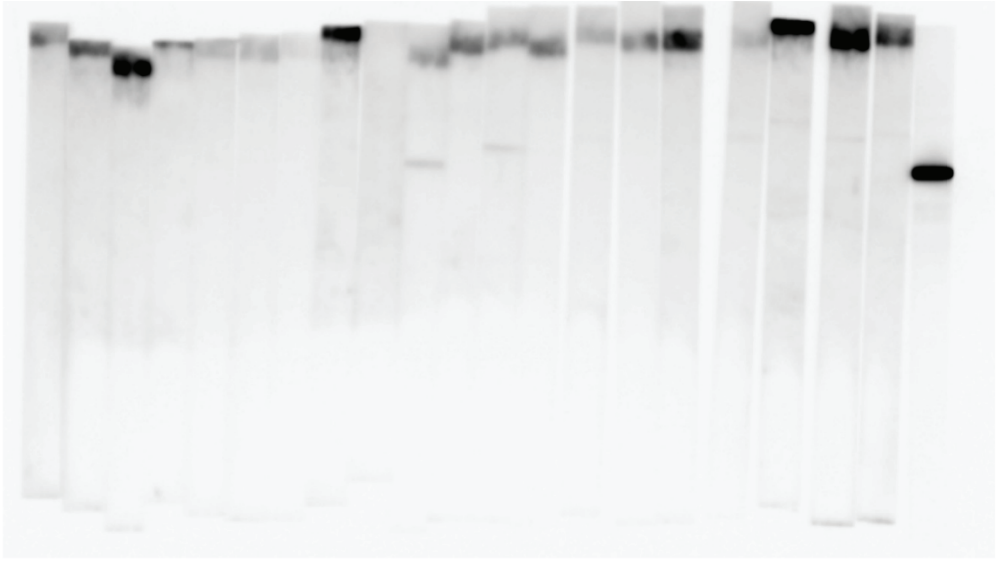

TS170  
TS171  
TS172  
TS173  
TS174  
TS175  
TS176  
TS177  
TS178  
TS179  
TS180  
TS181  
TS182  
TS183  
TS184  
TS185  
TS186  
TS187  
TS188  
TS189  
TS190  
FLAG

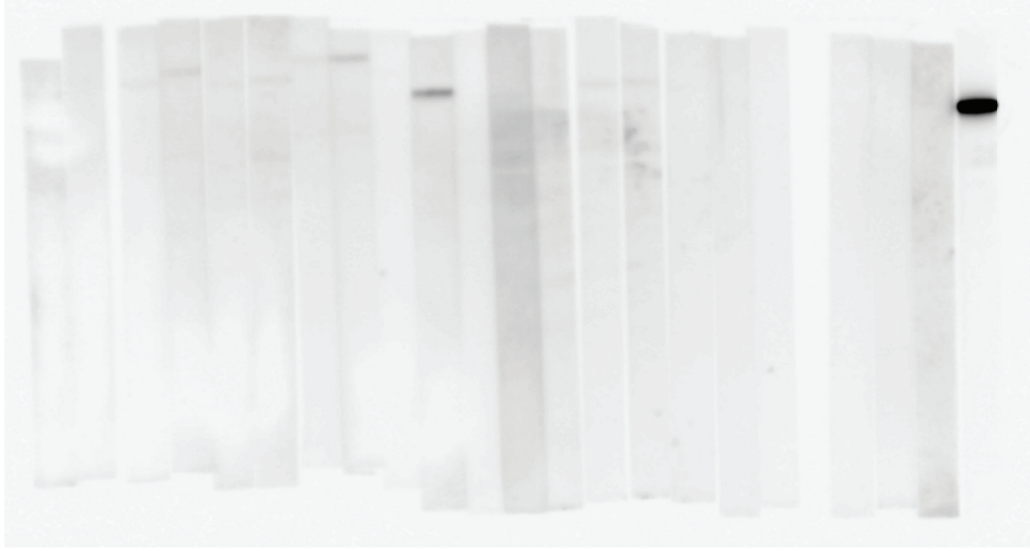



J1660  
J2476  
J2477  
J2484  
J2490  
J2492  
J2497  
J2501  
J2506  
J2574  
J2576  
J2581  
J2586  
J2589  
J3231  
J3235  
J3238  
J3250  
J3254  
J3263  
FLAG

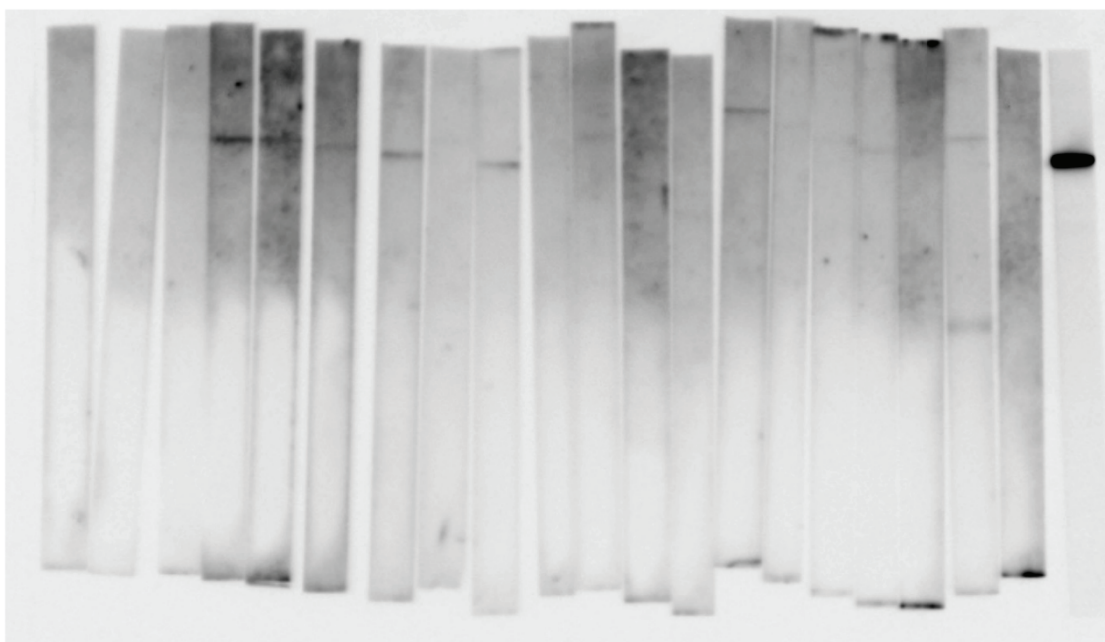

TS128  
TS129  
TS130  
TS131  
TS132  
TS133  
TS134  
TS135  
TS136  
TS137  
TS138  
TS139  
TS140  
TS141  
TS144  
TS145  
TS147  
FLAG

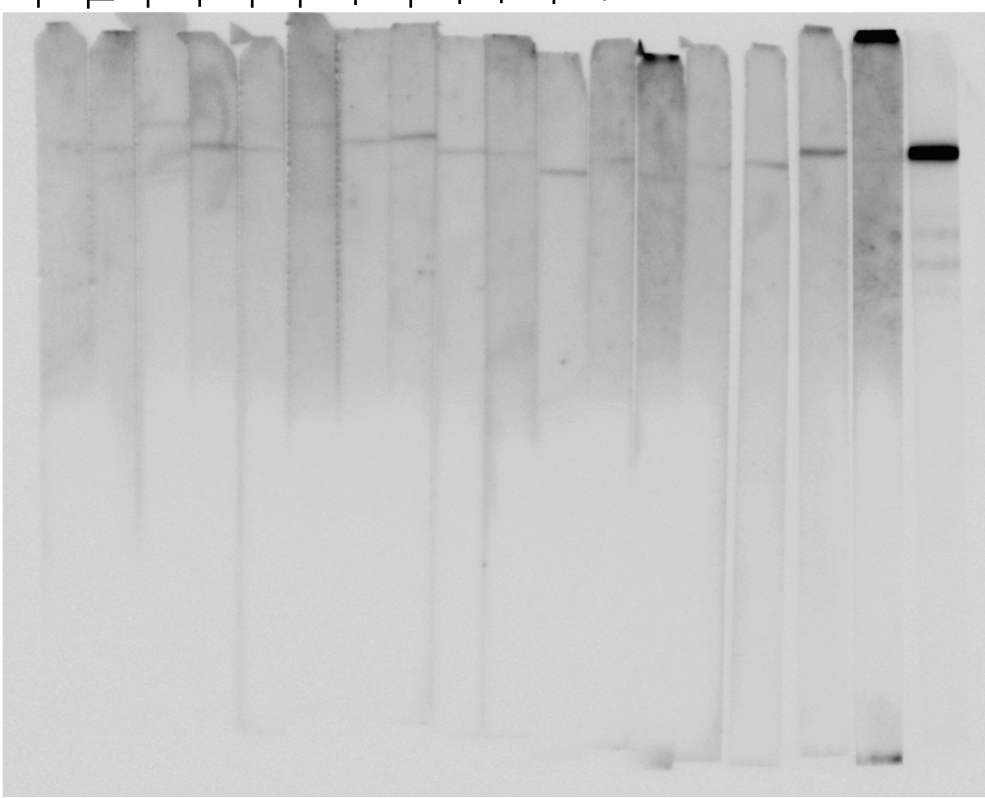

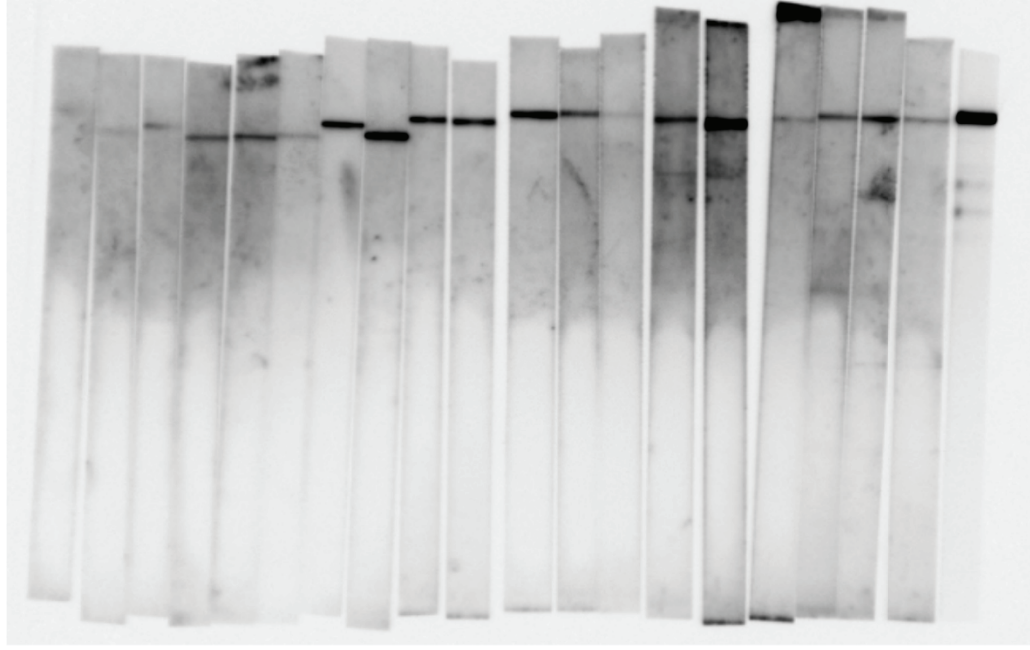

FLAG  
 J5149  
 J5148  
 M707  
 M704  
 M703  
 M702  
 M700  
 M699  
 J5169  
 J5168  
 J5153  
 J5147  
 J5145  
 J5144  
 J5140  
 J5130  
 J5125  
 J5123  
 J5122  
 J5113  
 J5111

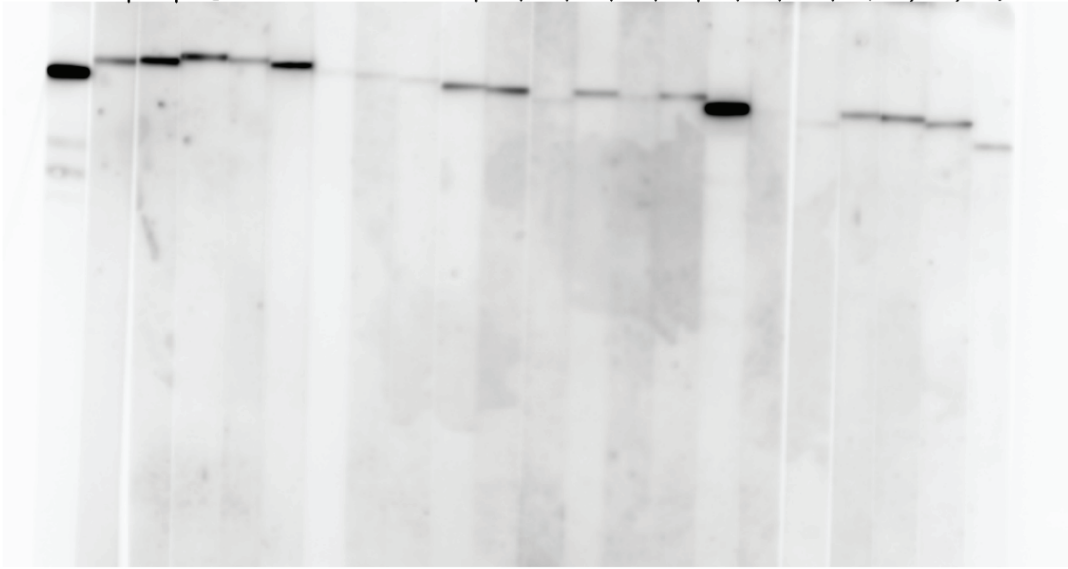

J5151  
J5170  
J5172  
J5173  
J5174  
J5281  
J5182  
J5187  
J5188  
J5189  
J5190  
J5362  
M698  
J5244  
J5247  
J5248  
J5249  
J5264  
J5265  
J5269  
FLAG

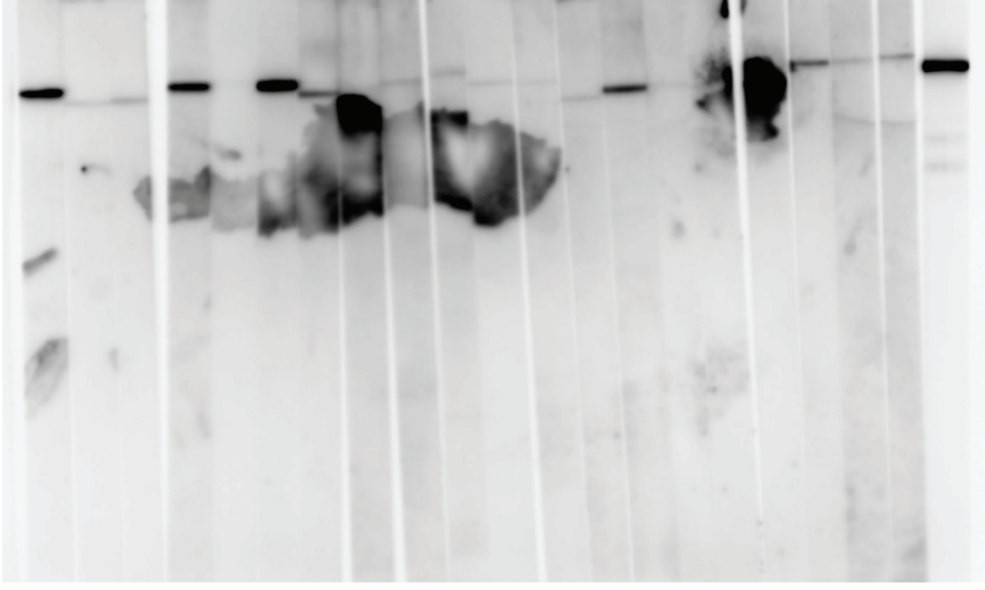

J1660  
J2476  
J2477  
J2484  
J2490  
J2492  
J2497  
J2501  
J2506  
J2574  
T5120  
J2576  
J2581  
J2586  
J2589  
J3231  
J3235  
J3238  
J3250  
J3254  
J3263  
FLAG

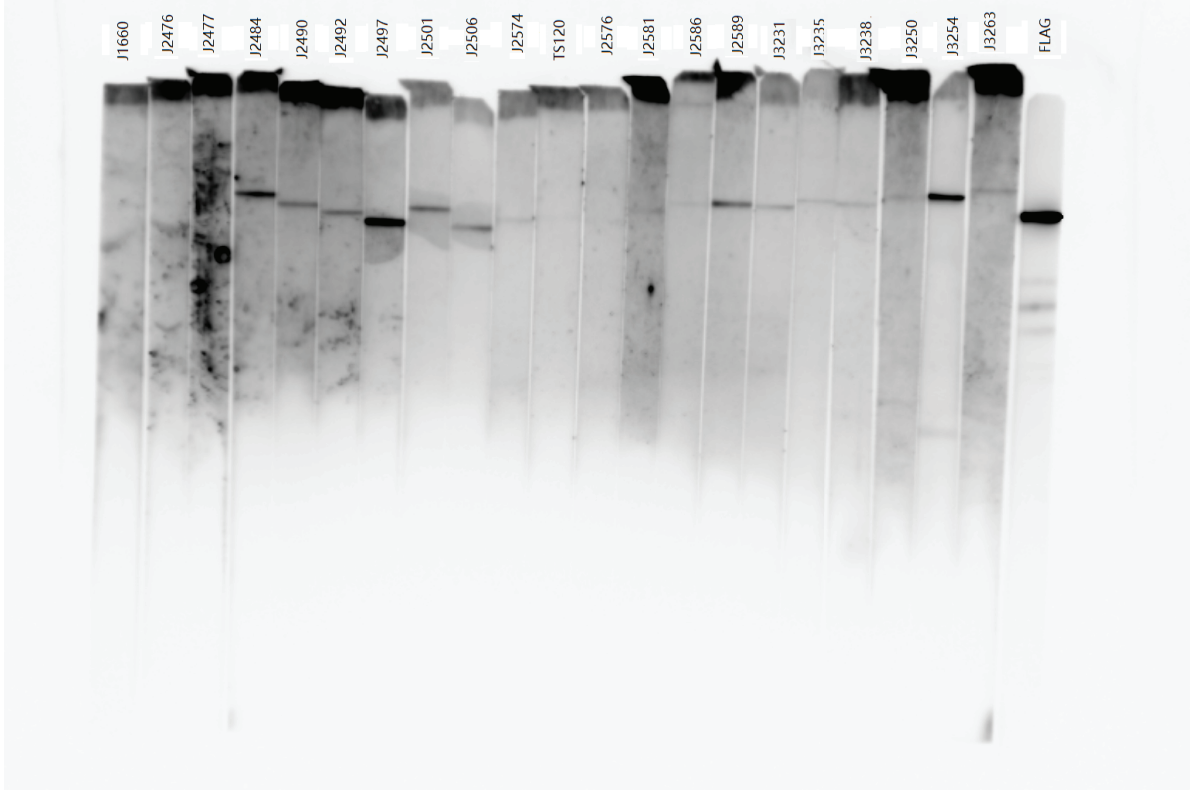

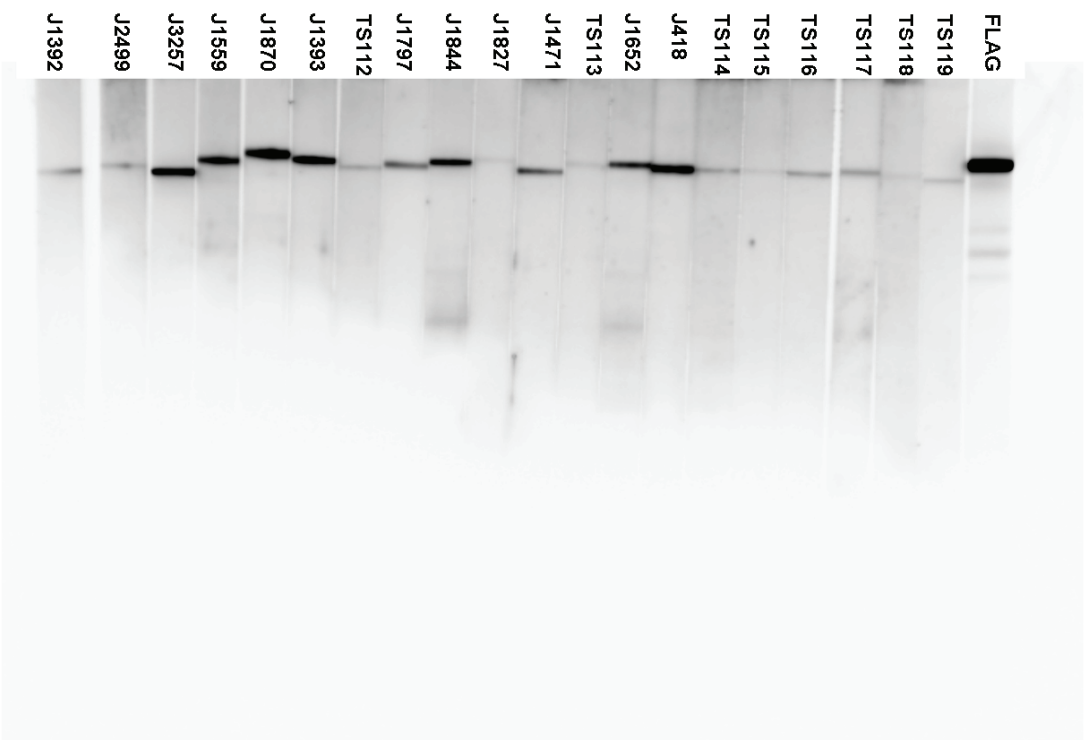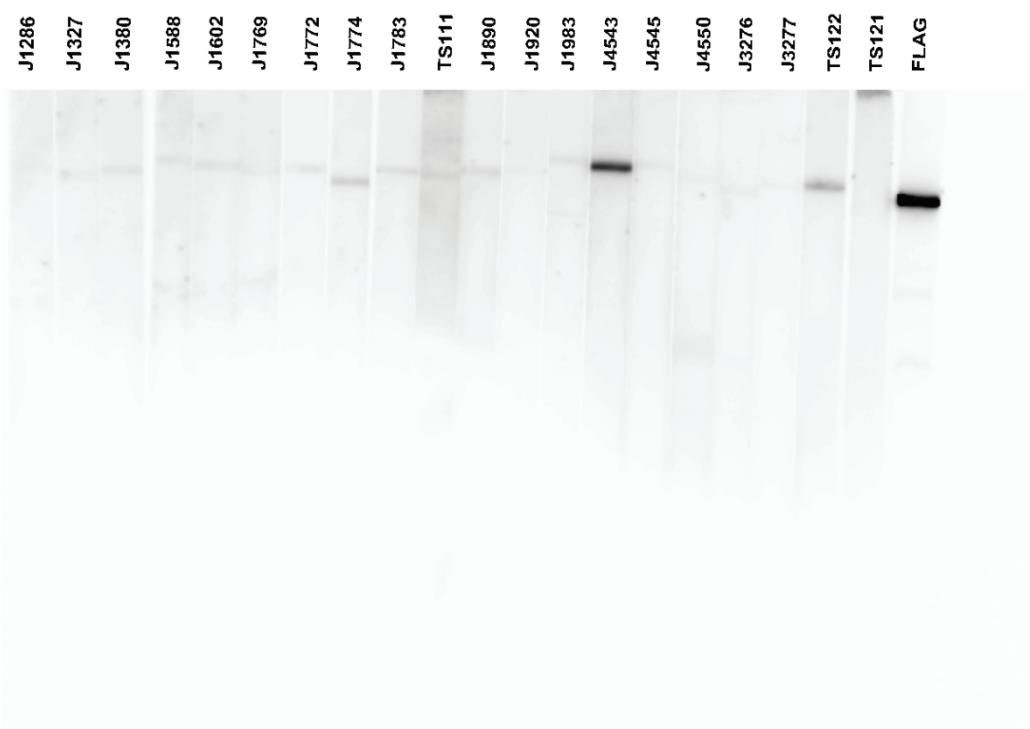

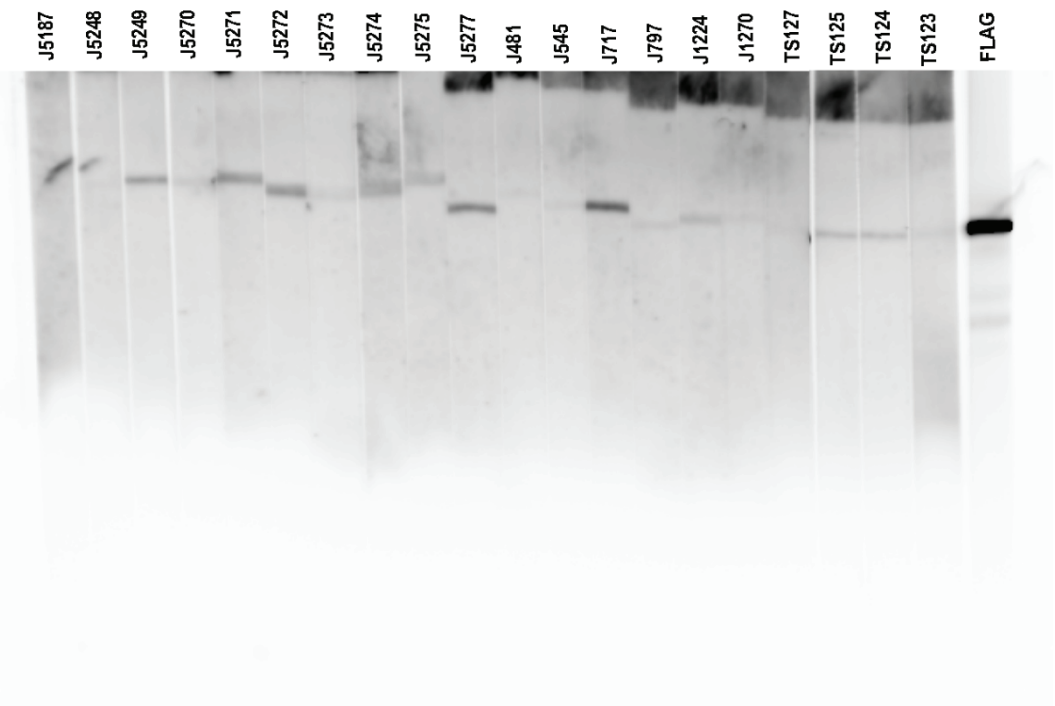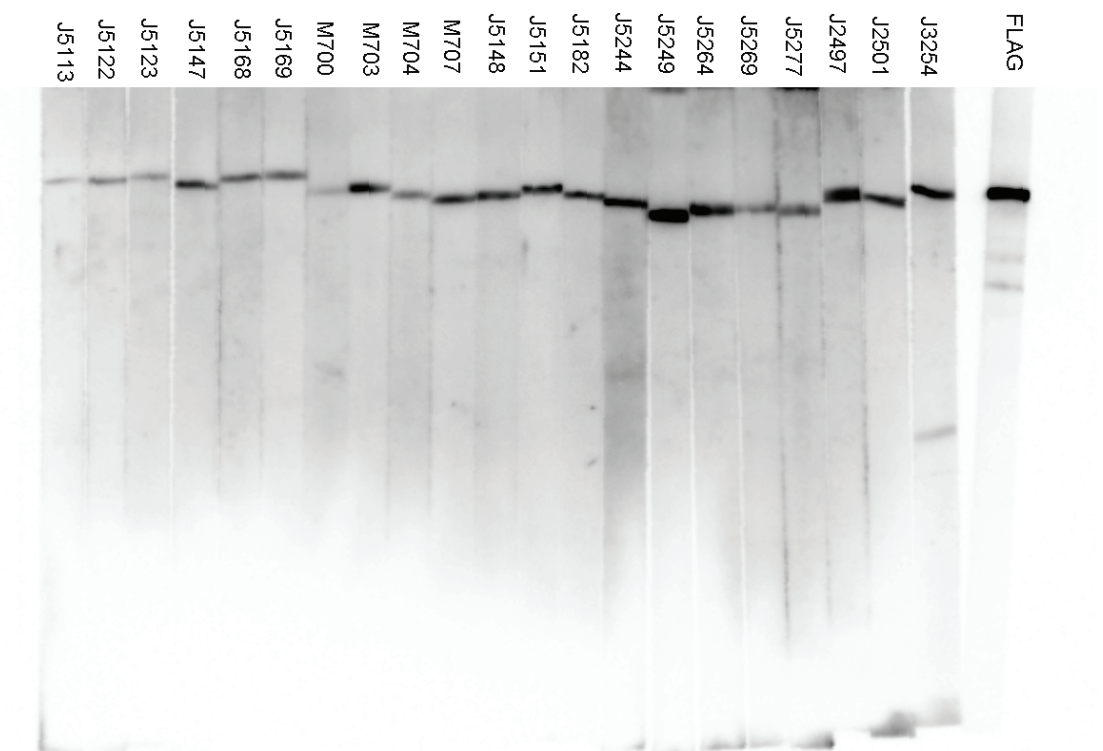

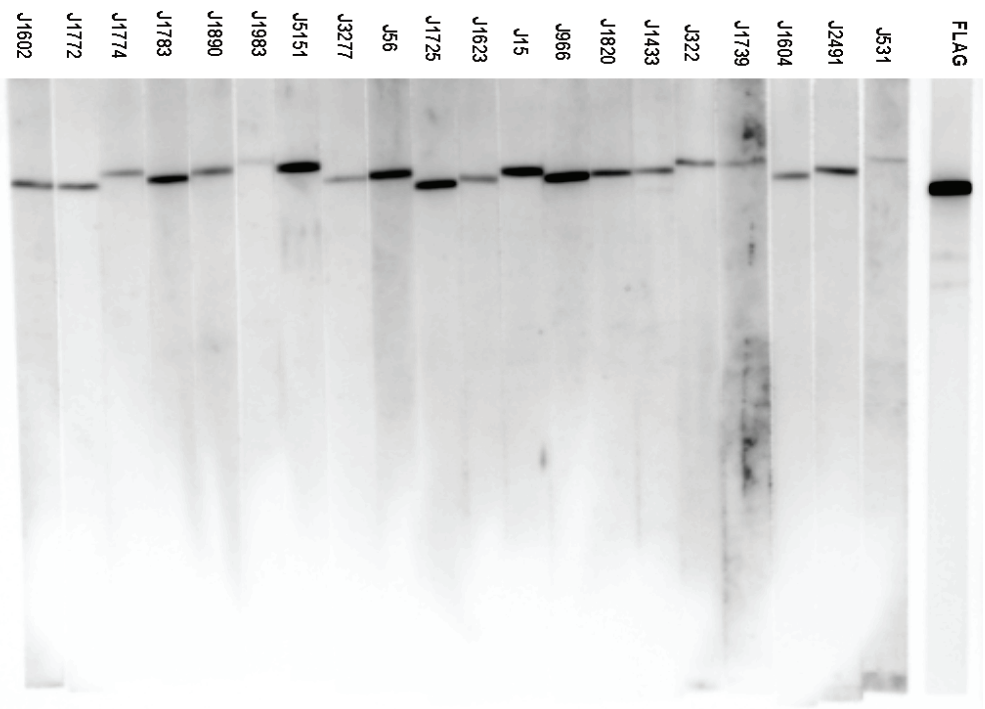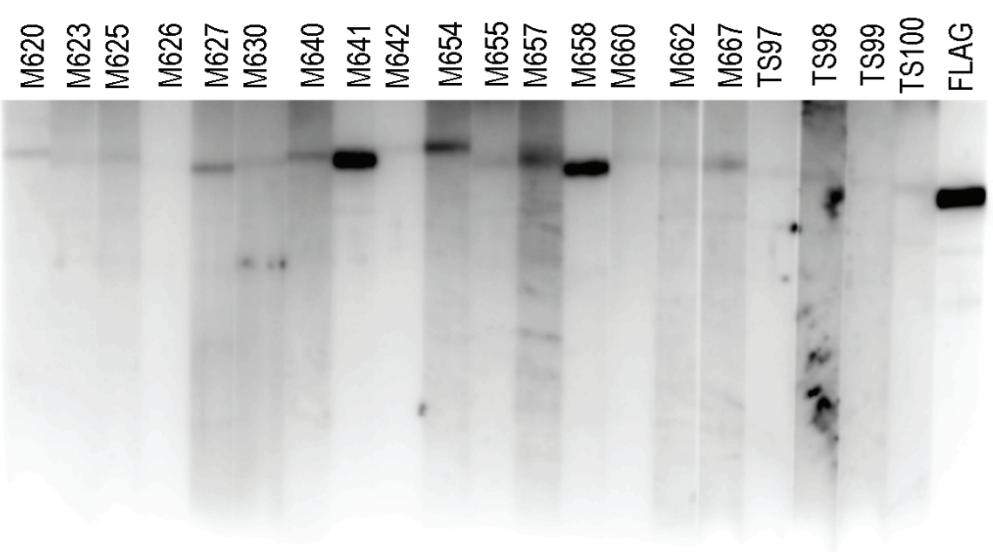

M620  
M623  
M625  
M626  
M627  
M630  
M640  
M641  
M642  
M654  
M655  
M657  
M658  
M660  
M662  
M667  
TS94  
TS95  
FLAG

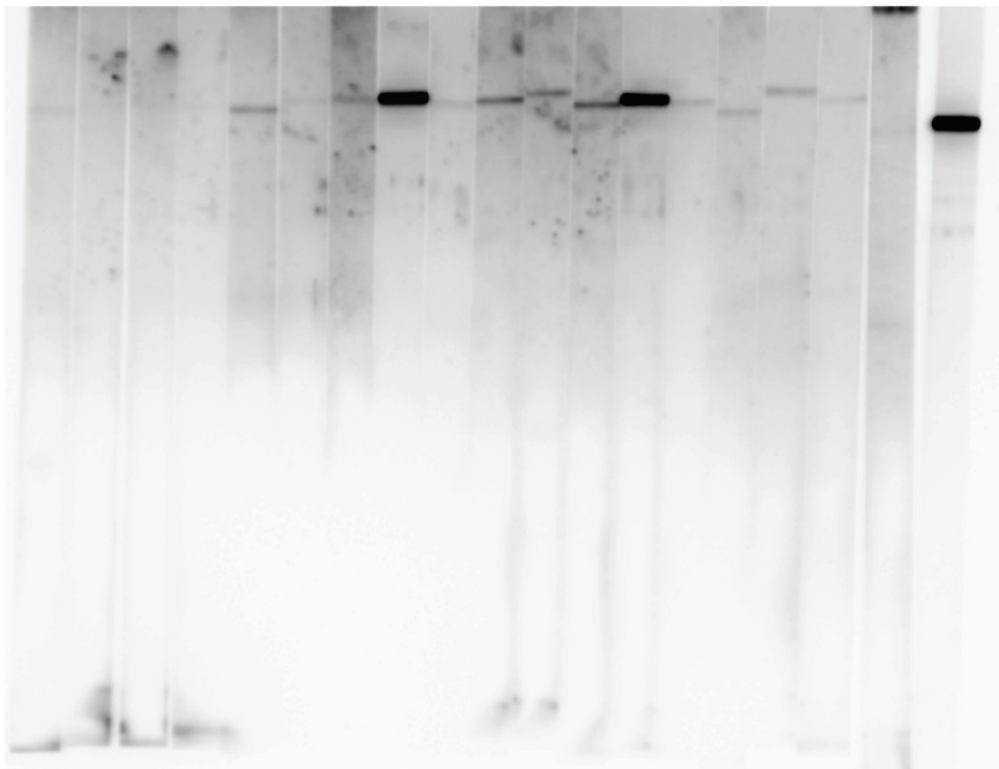

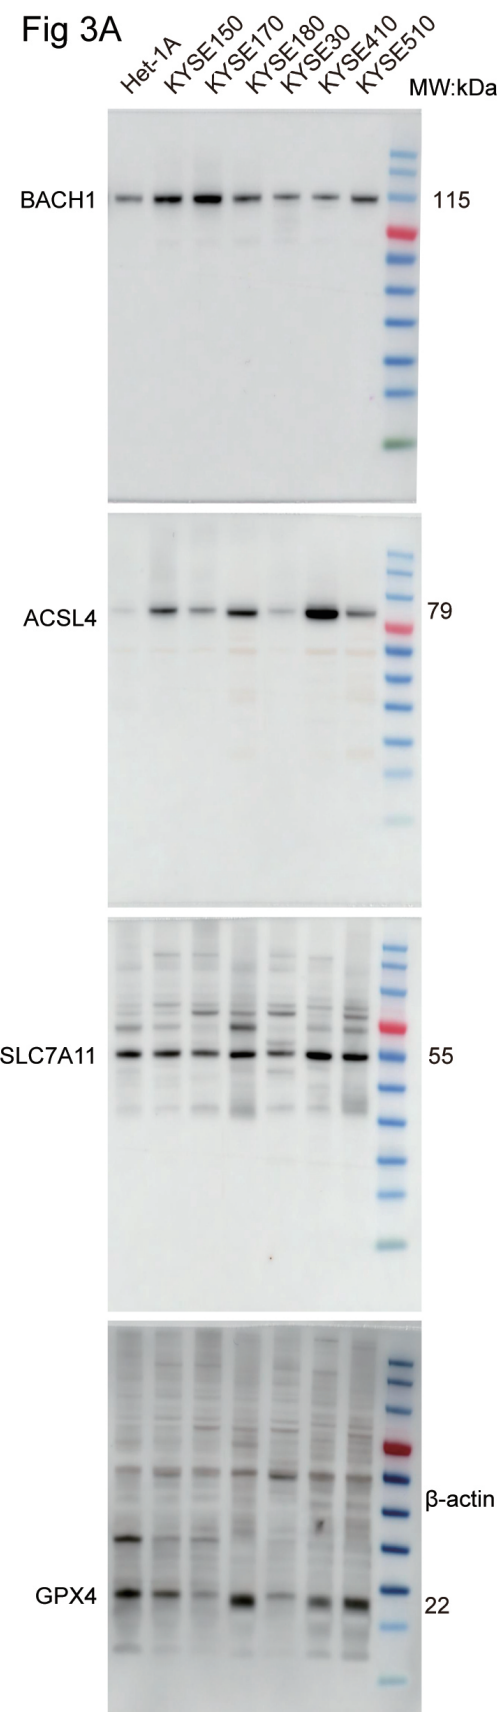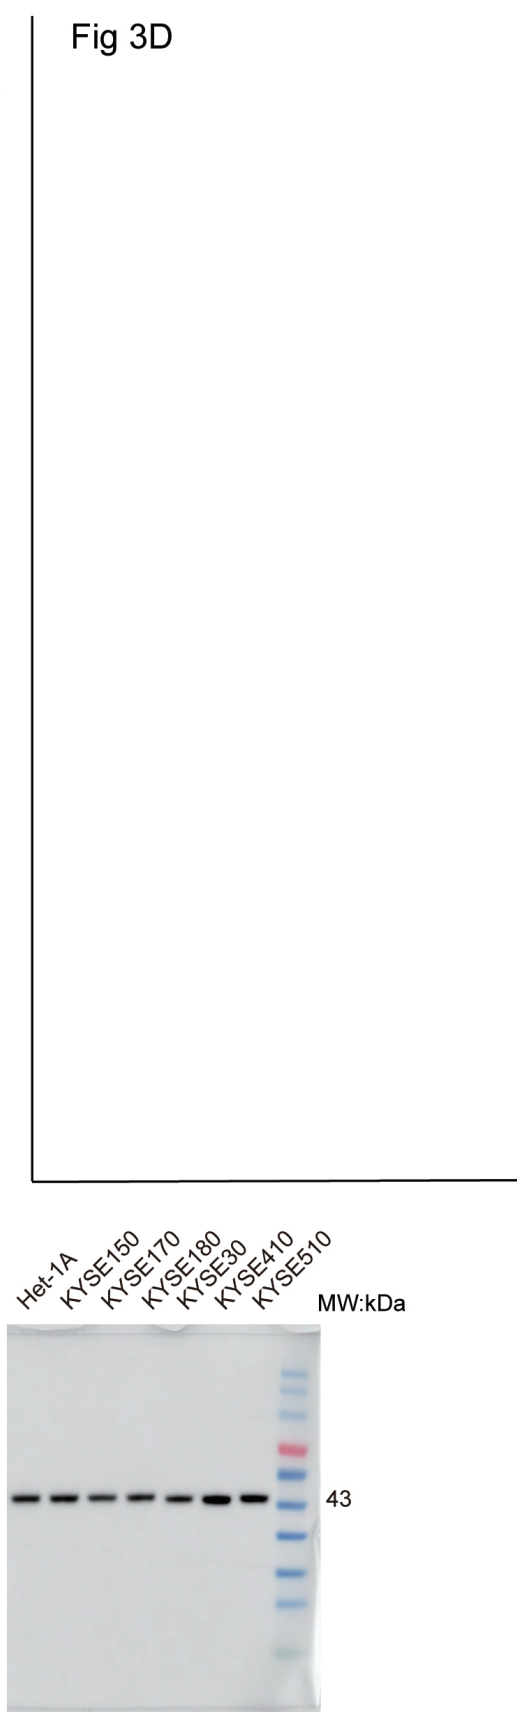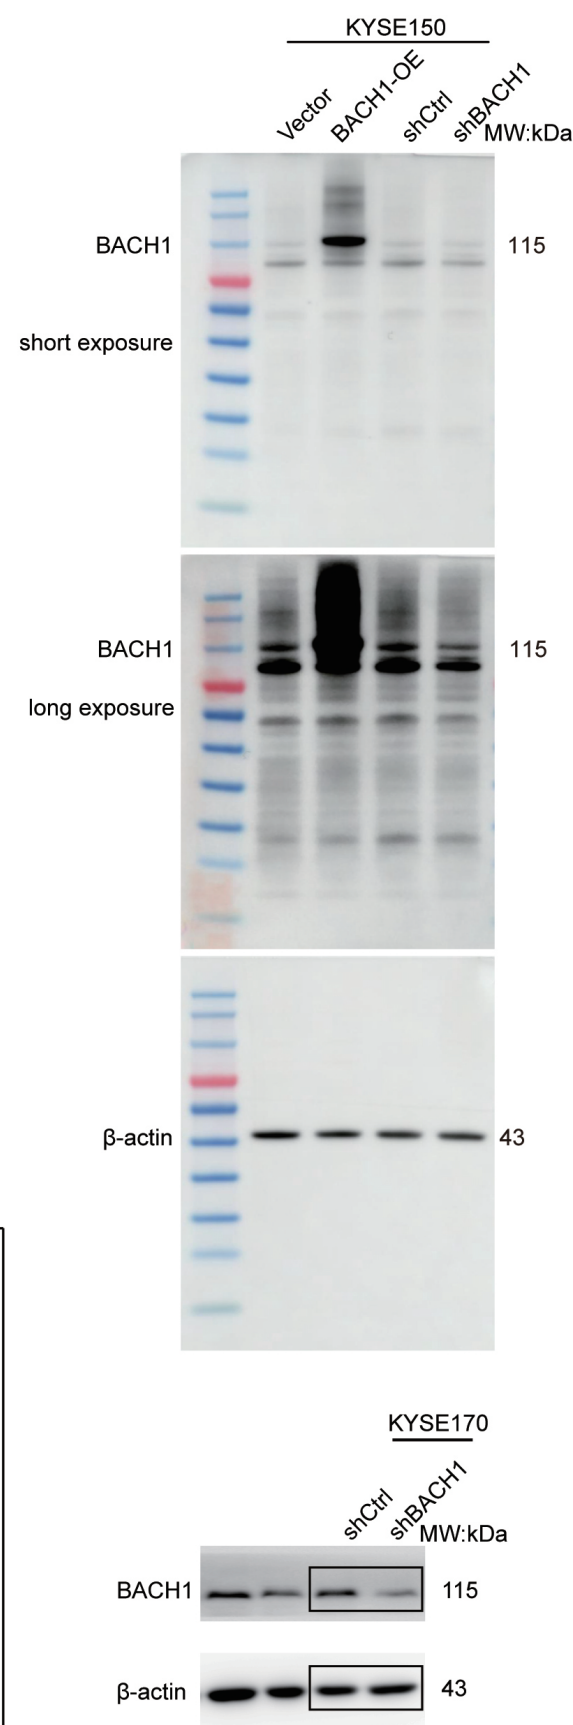



Fig 6D

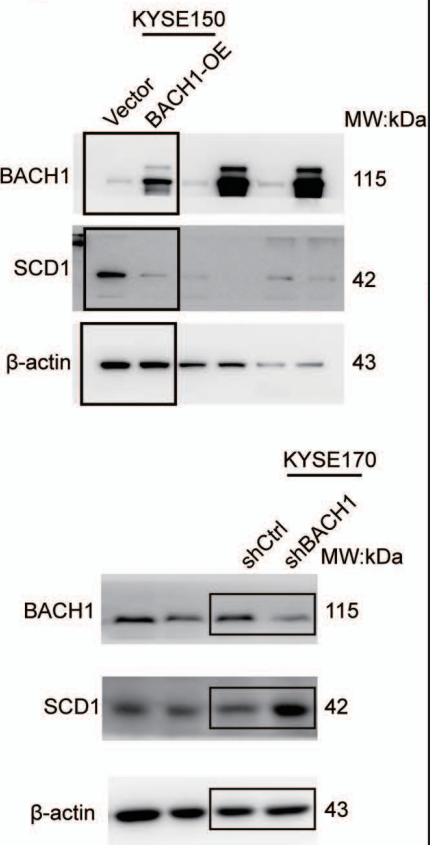

Fig 6D

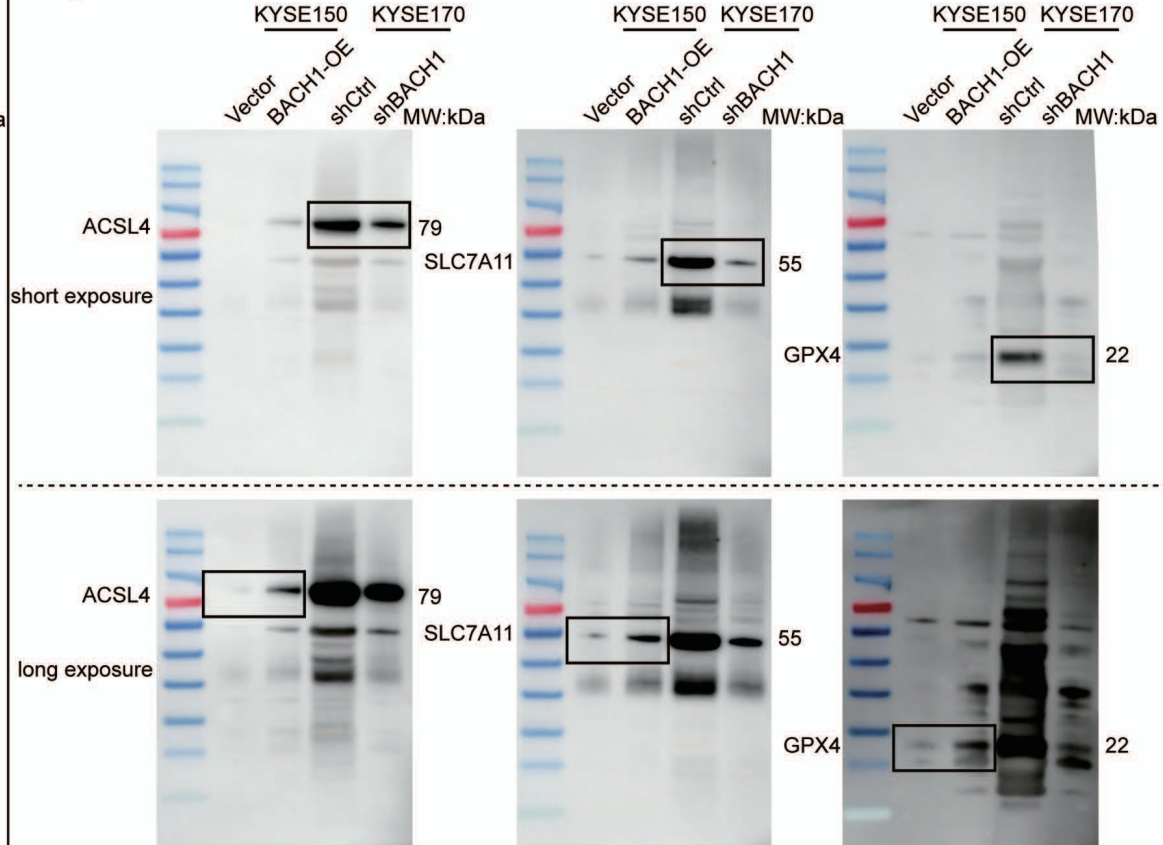

Fig 6G

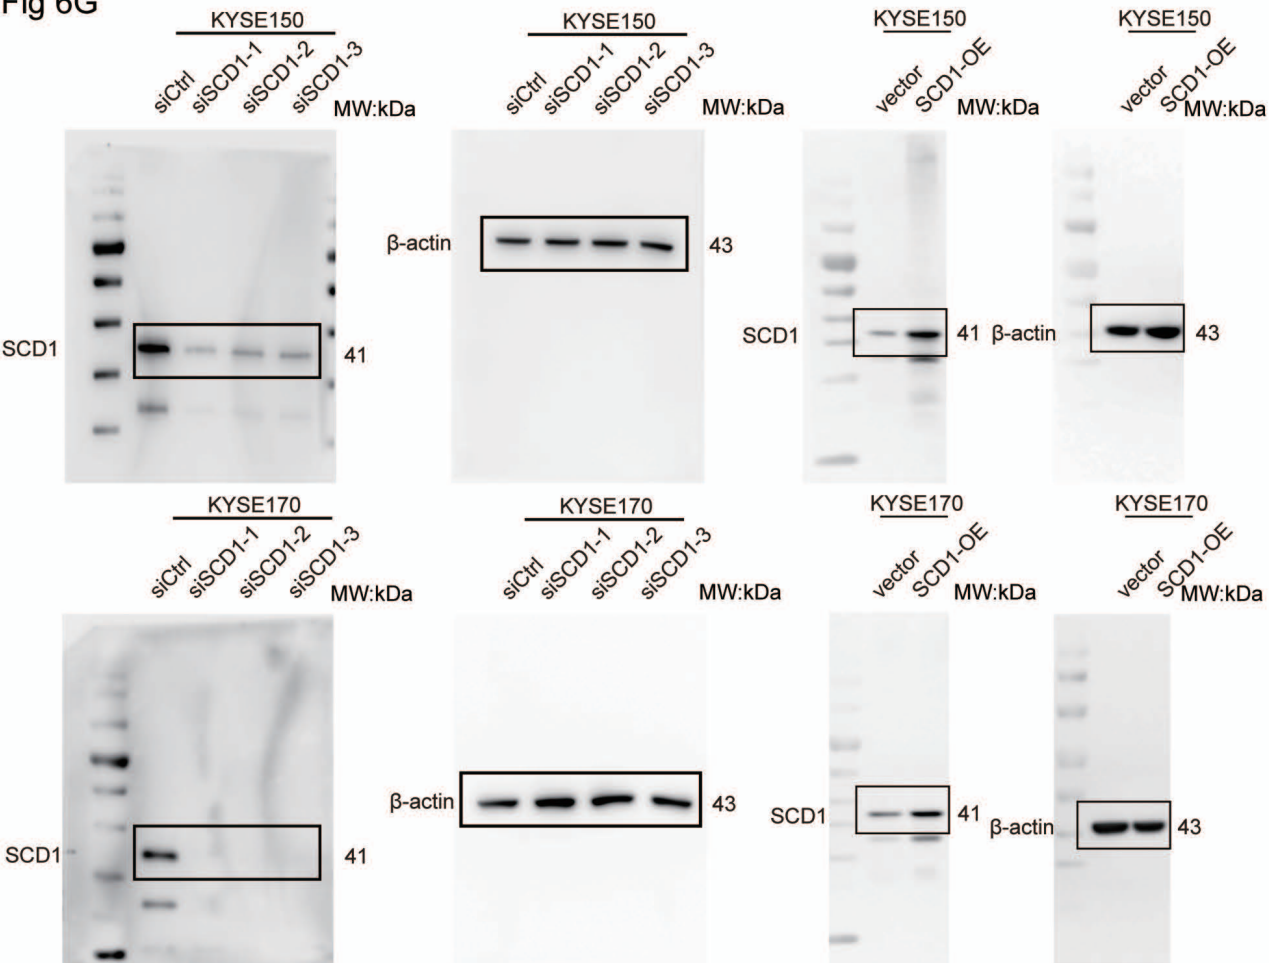

Supplement: 41419_2023_5571_MOESM3_ESM.pdf [file 41419_2023_5571_MOESM3_ESM.pdf]
