# Supplementary material for: BACH1-induced ferroptosis drives lymphatic metastasis by repressing the biosynthesis of monounsaturated fatty acids
Source: PubMed Central journal article supplement (PMC9860034; doi:10.1038/s41419-023-05571-z), 2023-01-20
Supplement: 41419_2023_5571_MOESM1_ESM.pdf [file 41419_2023_5571_MOESM1_ESM.pdf]

# **BACH1-induced ferroptosis drives lymphatic metastasis by repressing the biosynthesis of monounsaturated fatty acids**

Xiufeng Xie<sup>#</sup>, Lusong Tian<sup>#</sup>, Yan Zhao, Fang Liu, Shuyang Dai, Xinglu Gu, Yuxin Ye, Lanping Zhou, Xinmiao Liu, Yulin Sun, Xiaohang Zhao

State Key Laboratory of Molecular Oncology, National Cancer Center/National Clinical Research Center for Cancer/Cancer Hospital, Chinese Academy of Medical Sciences and Peking Union Medical College, Beijing 100021, P. R. China

## **Supplementary Figure:**

**Supplementary Fig. S1.** RT-qPCR assays validated the mRNA expression of SLC7A11, GCLM, FTH1 and FTL genes after overexpression or knockdown of BACH1 in KYSE150 and KYSE170 cells.

## **Supplementary Tables:**

**Supplementary Table S1** Clinical characteristics of study populations used in screening of HuProt Proteome arrays

**Supplementary Table S2** Clinical characteristics of study populations used in immunoassay

**Supplementary Table S3** Primers information

**Supplementary Table S4** Antibodies information

**Supplementary Table S5** The upregulated IgG autoantibodies detected in patients with T1-stage ESCC

**Supplementary Table S6** The differentially expressed IgG autoantibodies between T1-stage ESCC that with or without lymph node metastasis

**Supplementary Table S7** The 41 overlapped tumor-related IgG autoantibodies in T1-stage ESCC with LNM compared with those without LNM

**Supplementary Table S8** P Percentage of anti-BACH1 IgG autoantibody positive cases by immunoblotting

**Supplementary Table S9** Clinical significance of anti-BACH1 autoantibody detected in patients with ESCC using immunoassay

**Supplementary Table S10** Clinicopathological characteristics of BACH1 protein expression in 574 ESCC specimens

## Supplementary Figure:

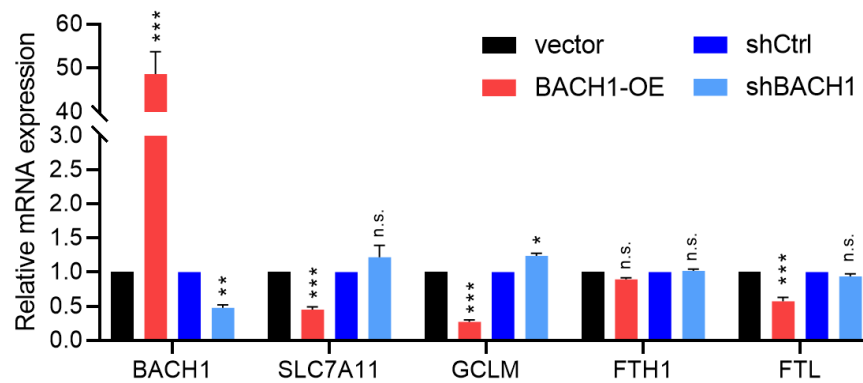

**Supplementary Figure S1.** RT-qPCR assays validated the mRNA expression of SLC7A11, GCLM, FTH1 and FTL genes after overexpression or knockdown of BACH1 in KYSE150 and KYSE170 cells. \*,  $P < 0.05$ ; \*\*,  $P < 0.01$ ; \*\*\*,  $P < 0.001$ ; N.s., not significant.

## Supplementary Tables:

**Supplementary Table S1.** Clinical characteristics of study populations used in screening of HuProt Proteome arrays

| Patient Characteristics | ESCC w/ LNM (n = 12) | ESCC w/o LNM (n = 12) | Health control (n=12) | P value            |
|-------------------------|----------------------|-----------------------|-----------------------|--------------------|
| Age in years            |                      |                       |                       |                    |
| Mean $\pm$ SD           | 59.5 $\pm$ 8.93      | 60 $\pm$ 9.93         | 59.41 $\pm$ 8.60      | 0.98 <sup>a</sup>  |
| Range                   | 47-76                | 43-70                 | 46-70                 |                    |
| Gender                  |                      |                       |                       |                    |
| Male                    | 10                   | 9                     | 10                    | 0.838 <sup>b</sup> |
| Female                  | 2                    | 3                     | 2                     |                    |
| TNM stage               |                      |                       |                       |                    |
| T1                      | 12                   | 12                    |                       | 1.00 <sup>b</sup>  |
| T2                      | 0                    | 0                     |                       |                    |
| T3                      | 0                    | 0                     |                       |                    |
| T4                      | 0                    | 0                     |                       |                    |
| Histological grade      |                      |                       |                       |                    |
| High                    | 0                    | 0                     |                       | 0.881 <sup>b</sup> |
| Middle                  | 4                    | 4                     |                       |                    |
| Low                     | 4                    | 5                     |                       |                    |
| unknow                  | 4                    | 3                     |                       |                    |

a: P values were calculated by one-way ANOVA

b: P values were calculated by *Chi* square test

**Supplementary Table S2.** Clinical characteristics of study populations used in immunoassay

| Patient Characteristics | ESCC w/ LNM<br>(n = 78) | ESCC w/o<br>LNM (n = 50) | Health control<br>(n = 122) | <i>P</i> value     |
|-------------------------|-------------------------|--------------------------|-----------------------------|--------------------|
| Age in years            |                         |                          |                             |                    |
| Mean $\pm$ SD           | 60.58 $\pm$ 9.45        | 59.58 $\pm$ 8.35         | 62.3 $\pm$ 7.79             | 0.122 <sup>a</sup> |
| Range                   | 37-79                   | 41-77                    | 43-77                       |                    |
| Gender                  |                         |                          |                             |                    |
| Male                    | 69                      | 37                       | 102                         | 0.104 <sup>b</sup> |
| Female                  | 9                       | 13                       | 20                          |                    |
| TNM stage               |                         |                          |                             |                    |
| T1                      | 6                       | 10                       |                             | 0.017 <sup>b</sup> |
| T2                      | 10                      | 13                       |                             |                    |
| T3                      | 45                      | 22                       |                             |                    |
| T4                      | 17                      | 5                        |                             |                    |
| Histological grade      |                         |                          |                             |                    |
| High                    | 6                       | 9                        |                             | 0.164 <sup>b</sup> |
| Middle                  | 32                      | 22                       |                             |                    |
| Low                     | 15                      | 10                       |                             |                    |
| unknow                  | 25                      | 9                        |                             |                    |

a: *P* values were calculated by one-way ANOVA

b: *P* values were calculated by *Chi* square test

### Supplementary Table S3. Primers information

Primer sequences and oligonucleotides

BACH1 qPCR primer, Forward: AGACGACTCTGAGACGGACA

BACH1 qPCR primer, Reverse: CGCTGTGCAGCAATTCTGTT

SREBF1 qPCR primer, Forward: ACAGTGACTTCCCTGGCCTAT

SREBF1 qPCR primer, Reverse: GCATGGACGGGTACATCTTCAA

SCD1 qPCR primer, Forward: TTCCTACCTGCAAGTTCTACACC

SCD1 qPCR primer, Reverse: CCGAGCTTTGTAAGAGCGGT

ATP5J qPCR primer, Forward: GTTCTCCTCTGTCATTCGGTCA

ATP5J qPCR primer, Reverse: TCACTCCAGATGTCTGTCGCTTAGAT

ATP5G qPCR primer, Forward: CCAGAGTTGCATACAGACCAAT

ATP5G qPCR primer, Reverse: CCCATTAAATACCGTAGAGCCCT

UCP3 qPCR primer, Forward: TGTTTTGCTGACCTCGTTACC

UCP3 qPCR primer, Reverse: GACGGAGTCATAGAGGCCGAT

TIMM8B qPCR primer, Forward: TCACTTCATGGAGTTATGTTGGG

TIMM8B qPCR primer, Reverse: AGACAATTTTCAGTGCAGAGATC

SLC25A22 qPCR primer, Forward: GCCAGCCAAGCTCATCAATG

SLC25A22 qPCR primer, Reverse: GAGGCAGTCGGACATGCTC

PDHX qPCR primer, Forward: TTGGGAGGTTCCGACCTGT

PDHX qPCR primer, Reverse: CAACCACTCGACTGTCACCTG

OCT1 qPCR primer, Forward: GTGTGTAGACCCCCTGGCTA

OCT1 qPCR primer, Reverse: GTGTAGCCAGCCATCCAGTT

NDUFB6 qPCR primer, Forward: CCACAGAAGATGGGGCCTATG

NDUFB6 qPCR primer, Reverse: TCCAGACAGGTACAAGTACATGA

SLC7A11 qPCR primer, Forward: TCTCCAAAGGAGGTTACCTGC

SLC7A11 qPCR primer, Reverse: AGACTCCCCTCAGTAAAGTGAC

GPX4 qPCR primer, Forward: GAGGCAAGACCGAAGTAAACTAC

GPX4 qPCR primer, Reverse: CCGAACTGGTTACACGGGAA

ChIP-PCR primer 1, Forward: CCTTGTGCTTGTGGGCTTTG

ChIP-PCR primer 1, Reverse: TCCCAGGTAGAGGGGTTTGA

ChIP-PCR primer 2, Forward: TAGCAACTGGTCGTGATTCCAG

ChIP-PCR primer 2, Reverse: GAGGCATTCTCCTAAGGGCT

ChIP-PCR primer 3, Forward: AATGCCTCTGGCAACTGA

ChIP-PCR primer 3, Reverse: AGCAAGGGAGCTTCTAGGGT

ACTB qPCR primer, Forward: CTCACCATGGATGATGATATCGC

ACTB qPCR primer, Reverse: TAGGAATCCTTCTGACCCATGC

siRNA negative control sense (5'-3'):UUCUCCGAAGGUGUCACGUTT

siRNA negative control antisense (5'-3'):ACGUGACACGUUCGGAGAATT

---

BACH1 silencing siRNA -1 sense (5'-3'): GGACCAGAGGGAUCUAGAATT

---

BACH1 silencing siRNA -1 antisense (5'-3'): UUCUAGAUGCCUCUGGUCCTT

---

SCD1 silencing siRNA -1 sense (5'-3'): GGAGAAACAUCAUCCUUAUTT

---

SCD1 silencing siRNA -1 antisense (5'-3'): AUAAGGAUGAUGUUUCUCCTT

---

SCD1 silencing siRNA -2 sense (5'-3'): GCUUGCUGAUGAUGUGCUUTT

---

SCD1 silencing siRNA -2 antisense (5'-3'): AAGCACAUCAUCAGCAAGCTT

---

SCD1 silencing siRNA -3 sense (5'-3'): GCGAUAUGCUGUGGUGCUUTT

---

SCD1 silencing siRNA -3 antisense (5'-3'): AAGCACACAGCAUAUCGCTT

---

**Supplementary Table S4. Antibodies information**

| Antibodies                               | Source                           | Catalog number/ identifier   |
|------------------------------------------|----------------------------------|------------------------------|
| BACH1 for WB, IHC & IF                   | Abclonal                         | A5393/ RRID: AB_2766202      |
| BACH1 for IP                             | R&D Systems                      | AF5776/ RRID: AB_2061974     |
| SLC7A11                                  | Proteintech                      | 26864-1-AP, RRID: AB_2880661 |
| GPX4                                     | Abcam                            | ab41787, RRID: AB_941790     |
| ACSL4                                    | Abcam                            | ab205197                     |
| AMPK                                     | CST                              | 5831/ RRID: AB_10622186      |
| p-AMPK                                   | CST                              | 2535/ RRID: AB_331250        |
| SREBF1                                   | Proteintech                      | 14088-1-AP/ RRID: AB_2255217 |
| SCD1                                     | Abcam                            | ab236868                     |
| $\beta$ -Actin                           | Sigma-Aldrich, St. Louis, MO     | A5316, RRID: AB_476743       |
| Flag                                     | MBL, Sakae Naka-ku Nagoya, Japan | M185-3L/ RRID:AB_11123930    |
| HA                                       | CST, Danvers, MA                 | 3724s/ RRID:AB_1549585       |
| HRP-conjugated mouse secondary antibody  | CST                              | 58802/ RRID:AB_2799549       |
| HRP-conjugated rabbit secondary antibody | CST                              | 93702/ RRID:AB_2800208       |

WB, western blot analysis; IHC, immunohistochemistry; IF, immunofluorescence taining; IP, immunoprecipitation; MBL, Medical & Biological Laboratories; CST, Cell Signaling Technology; RRID, Research Resource Identifier (<https://scicrunch.org/resources>)

**Supplementary Table S8.** Percentage of anti-BACH1 IgG autoantibody positive cases by immunoblotting

|                  | Negative    | Positive   | <i>P</i> value | AUC   | Sensitivity% | Specificity% |
|------------------|-------------|------------|----------------|-------|--------------|--------------|
| Healthy controls | 119 (97.5%) | 3 (2.5%)   | <0.001         | 0.767 | 32.8         | 95           |
| ESCC             | 98 (76.6%)  | 30 (23.4%) |                |       |              |              |
| Healthy controls | 119 (97.5%) | 3 (2.5%)   | 0.0095         | 0.695 | 20.5         | 95           |
| Early ESCC       | 34 (87.2%)  | 5 (12.8%)  |                |       |              |              |
| ESCC w/o LNM     | 44 (88%)    | 6 (12%)    | 0.0145         | 0.672 | 14.1         | 95           |
| ESCC w/ LNM      | 54 (69.2%)  | 24 (30.8%) |                |       |              |              |

LNM, lymph node metastasis.

The cut-off value was determined as the mean+3SDs of healthy controls.

*P* values were calculated by *Chi* square test.



**Supplementary Table S9.** Clinical significance of anti-BACH1 autoantibody detected in patients with ESCC using immunoassay

|                    | Negative, n (%) | Positive, n (%) | <i>P</i> value |
|--------------------|-----------------|-----------------|----------------|
| Age                |                 |                 | 0.880          |
| >=60               | 54 (76.1%)      | 17 (23.9%)      |                |
| <60                | 44 (77.2%)      | 13 (22.8%)      |                |
| Gender             |                 |                 | 0.058          |
| Male               | 78 (73.6%)      | 28 (26.4%)      |                |
| Female             | 20 (90.9%)      | 2 (9.1%)        |                |
| Histological grade |                 |                 | 0.568          |
| High               | 12 (80%)        | 3 (20%)         |                |
| Middle             | 44 (81.5%)      | 10 (18.5%)      |                |
| Low                | 17 (68%)        | 8 (32%)         |                |
| Unknown            | 25 (73.5%)      | 9 (26.5%)       |                |
| Tumor location     |                 |                 | 0.1848         |
| Upper              | 7 (87.5%)       | 1 (12.5%)       |                |
| Middle             | 19 (63.3%)      | 11 (36.7%)      |                |
| Lower              | 29 (82.9%)      | 6 (17.1%)       |                |
| Unknown            | 43 (78.2%)      | 12 (21.8%)      |                |
| Tumor size         |                 |                 | 0.0924         |
| <5 cm              | 41 (87.2%)      | 6 (12.8%)       |                |
| >= 5cm             | 37 (71.2%)      | 15 (28.8%)      |                |
| Unknown            | 20 (69%)        | 9 (31%)         |                |
| T stages           |                 |                 | 0.290          |
| T1                 | 14 (87.5%)      | 2 (12.5%)       |                |
| T2                 | 20 (87%)        | 3 (13%)         |                |
| T3                 | 49 (73.1%)      | 18 (26.9%)      |                |
| T4                 | 15 (68.2%)      | 7 (31.8%)       |                |
| N staging          |                 |                 | 0.0145         |
| Negative           | 44 (88%)        | 6 (12%)         |                |
| Positive           | 54 (69.2%)      | 24 (30.8%)      |                |
| M staging          |                 |                 | 0.99           |
| Yes                | 7 (77.8%)       | 2 (22.2%)       |                |
| No                 | 91 (76.5%)      | 28 (23.5%)      |                |
| AJCC               |                 |                 | 0.0012         |
| Stage 0-II         | 45 (91.8%)      | 4 (8.2%)        |                |
| Stage III-IV       | 53 (67.1%)      | 26 (32.9%)      |                |

*P* values were calculated by *Chi* square test.

**Supplementary Table S10.** Clinicopathological characteristics of BACH1 protein expression in 574 ESCC specimens

|                    | BACH1 expression |                 | <i>P</i> value |
|--------------------|------------------|-----------------|----------------|
|                    | Negative, n (%)  | Positive, n (%) |                |
| Gender             |                  |                 | 0.14119        |
| Male               | 360 (86.33%)     | 57 (13.67%)     |                |
| Female             | 140 (90.91%)     | 14 (9.09%)      |                |
| Age                |                  |                 | 0.624601       |
| <65                | 269 (88.20%)     | 36 (11.80%)     |                |
| >= 65              | 231 (86.84%)     | 35 (13.16%)     |                |
| Histological grade |                  |                 | 0.000079       |
| I                  | 35 (25.74%)      | 101 (74.26%)    |                |
| I-II+II            | 175 (55.03%)     | 143 (44.97%)    |                |
| II-III+III         | 82 (71.93%)      | 32 (28.07%)     |                |
| Tumor size         |                  |                 | 0.65449        |
| <5cm               | 120 (78.95%)     | 32 (21.05%)     |                |
| >= 5cm             | 103 (81.10%)     | 24 (18.90%)     |                |
| T staging          |                  |                 | 0.901433       |
| T1                 | 27 (90.00%)      | 3 (10.00%)      |                |
| T2                 | 95 (86.36%)      | 15 (13.64%)     |                |
| T3                 | 349 (87.47%)     | 50 (12.53%)     |                |
| T4                 | 13 (86.67%)      | 2 (13.33%)      |                |
| N staging          |                  |                 | 0.03646        |
| N0-2               | 481 (88.10%)     | 65 (11.90%)     |                |
| N3                 | 15 (71.43%)      | 6 (28.57%)      |                |
| M staging          |                  |                 | 1              |
| M0                 | 493 (87.57%)     | 70 (12.43%)     |                |
| M1                 | 7 (87.50%)       | 1 (12.50%)      |                |
| TNM staging        |                  |                 | 0.251737       |
| I                  | 54 (93.10%)      | 4 (6.90%)       |                |
| II                 | 208 (86.67%)     | 32 (13.33%)     |                |
| III                | 196 (87.89%)     | 27 (12.11%)     |                |
| IV                 | 26 (78.79%)      | 7 (21.21%)      |                |
