# Supplementary material for: BACH1-induced ferroptosis drives lymphatic metastasis by repressing the biosynthesis of monounsaturated fatty acids
Source: PubMed Central journal article supplement (PMC9860034; doi:10.1038/s41419-023-05571-z), 2023-01-20
Supplement: 41419_2023_5571_MOESM2_ESM.pdf [file 41419_2023_5571_MOESM2_ESM.pdf]

**Supplementary Table S5.** The upregulated IgG autoantibodies detected in patients with T1-stage ESCC

| <b>Gene Symbol</b> | <b>ID</b>      | <b>HC1</b> | <b>HC2</b> | <b>HC3</b> | <b>HC4</b> | <b>w/o<br/>LNM1</b> | <b>w/o<br/>LNM2</b> | <b>w/o<br/>LNM3</b> | <b>w/o<br/>LNM4</b> | <b>w/<br/>LNM1</b> | <b>w/<br/>LNM2</b> | <b>w/<br/>LNM3</b> | <b>w/<br/>LNM4</b> | <b>FC<br/>(ESCC vs. HC)</b> |
|--------------------|----------------|------------|------------|------------|------------|---------------------|---------------------|---------------------|---------------------|--------------------|--------------------|--------------------|--------------------|-----------------------------|
| TP53               | NM_000546.2    | 2.021      | 1.940      | 2.364      | 2.488      | 18.935              | 11.426              | 6.076               | 3.785               | 3.341              | 2.191              | 44.063             | 2.810              | 5.255                       |
| MARCKSL1           | BC066915.1     | 2.107      | 2.113      | 1.738      | 2.414      | 3.501               | 8.852               | 3.186               | 4.864               | 2.159              | 1.959              | 2.045              | 2.276              | 1.723                       |
| MED22              | NM_133640.3    | 3.620      | 2.536      | 2.410      | 2.926      | 6.189               | 9.994               | 4.341               | 5.227               | 17.923             | 5.751              | 7.606              | 17.238             | 3.232                       |
| CDC47L             | NM_018719.2    | 3.249      | 2.522      | 2.109      | 2.866      | 3.559               | 4.708               | 3.911               | 4.429               | 4.713              | 7.508              | 2.790              | 2.983              | 1.610                       |
| ERBB4              | NM_001042599.1 | 3.687      | 2.331      | 2.667      | 3.428      | 6.751               | 6.294               | 29.899              | 3.769               | 3.253              | 12.651             | 3.555              | 3.263              | 2.866                       |
| FAM131C            | NM_182623.1    | 3.470      | 2.939      | 2.601      | 3.892      | 4.451               | 16.001              | 9.146               | 10.507              | 2.665              | 9.139              | 2.686              | 7.747              | 2.416                       |
| RAP1GDS1           | BC098334.1     | 3.787      | 2.186      | 1.950      | 3.652      | 12.782              | 3.899               | 5.109               | 4.487               | 4.395              | 9.271              | 2.285              | 2.671              | 1.939                       |
| PNMA2              | BC036489.1     | 3.289      | 2.806      | 2.525      | 3.668      | 3.799               | 4.311               | 10.668              | 3.954               | 4.728              | 6.842              | 22.827             | 4.372              | 2.503                       |
| SLC25A26           | BC012852.1     | 3.450      | 3.253      | 2.206      | 3.582      | 5.240               | 10.479              | 3.685               | 5.496               | 4.897              | 6.221              | 3.262              | 3.080              | 1.696                       |
| LGALS8             | NM_201543.1    | 4.602      | 6.611      | 3.461      | 5.637      | 7.843               | 16.278              | 12.722              | 10.923              | 10.645             | 9.897              | 15.162             | 3.912              | 2.151                       |
| SPATC1             | NM_198572.1    | 2.090      | 2.079      | 1.805      | 2.156      | 4.264               | 3.010               | 4.166               | 2.860               | 2.237              | 3.061              | 5.895              | 2.218              | 1.704                       |
| KLHL3              | BC034035.1     | 2.852      | 2.444      | 2.315      | 2.449      | 5.670               | 3.401               | 2.896               | 4.285               | 2.970              | 10.512             | 4.447              | 2.061              | 1.801                       |
| SBSN               | NM_198538.1    | 2.445      | 2.518      | 2.058      | 2.228      | 2.902               | 6.642               | 2.601               | 3.340               | 3.461              | 4.268              | 2.320              | 2.226              | 1.501                       |
| DEFB126            | NM_030931.2    | 2.371      | 3.317      | 2.101      | 5.021      | 18.619              | 14.375              | 3.643               | 9.652               | 6.034              | 7.946              | 12.052             | 6.568              | 3.079                       |
| EMCN               | BC017781.1     | 2.933      | 3.692      | 2.212      | 7.990      | 14.774              | 6.802               | 18.901              | 9.702               | 33.074             | 9.889              | 4.959              | 11.743             | 3.264                       |
| GORASP1            | NM_031899.2    | 2.437      | 2.906      | 3.496      | 6.294      | 17.425              | 7.444               | 7.271               | 5.509               | 8.343              | 10.214             | 2.925              | 9.209              | 2.258                       |
| ITGB8              | NM_002214.2    | 2.851      | 3.956      | 1.958      | 4.509      | 7.755               | 7.231               | 3.454               | 7.831               | 3.622              | 5.045              | 4.792              | 2.821              | 1.603                       |
| PODNL1             | NM_024825.2    | 3.093      | 2.865      | 2.319      | 4.371      | 4.289               | 4.445               | 5.664               | 4.703               | 7.649              | 17.810             | 6.058              | 3.552              | 2.142                       |
| NRG3               | NM_001010848.3 | 5.420      | 4.952      | 2.892      | 4.431      | 20.419              | 6.008               | 3.868               | 11.596              | 3.415              | 8.899              | 8.476              | 2.762              | 1.849                       |
| STAT5A             | NM_003152.2    | 4.202      | 3.102      | 2.177      | 3.054      | 6.538               | 11.821              | 5.341               | 3.808               | 6.857              | 4.946              | 2.781              | 2.529              | 1.780                       |
| PROL1              | NM_021225.4    | 6.479      | 3.162      | 2.208      | 4.335      | 10.474              | 8.234               | 3.951               | 8.716               | 3.911              | 6.482              | 5.514              | 4.074              | 1.587                       |
| RXRA               | BC007925.1     | 3.700      | 3.496      | 2.123      | 3.239      | 4.081               | 10.437              | 3.273               | 4.741               | 5.141              | 6.679              | 3.092              | 2.941              | 1.608                       |
| SIGLEC8            | BC053319.1     | 3.135      | 3.156      | 2.494      | 3.601      | 8.072               | 3.453               | 3.605               | 6.634               | 3.410              | 6.250              | 6.243              | 3.838              | 1.676                       |
| PRM1               | NM_002761.1    | 4.702      | 4.184      | 2.408      | 4.274      | 5.764               | 11.117              | 3.512               | 6.308               | 5.917              | 7.160              | 3.577              | 3.428              | 1.503                       |
| ST6GAL2            | BC008680.1     | 4.069      | 3.333      | 2.563      | 4.304      | 8.516               | 4.448               | 4.043               | 5.680               | 4.061              | 6.680              | 5.786              | 4.526              | 1.533                       |
| PTGES3L-<br>AARSD1 | NM_025267.2    | 3.210      | 3.363      | 3.163      | 4.656      | 4.961               | 22.644              | 4.535               | 16.902              | 4.584              | 3.457              | 4.534              | 2.234              | 2.218                       |
| PALM2              | NM_001037293.1 | 3.877      | 14.004     | 13.889     | 7.242      | 29.660              | 35.582              | 3.811               | 45.031              | 41.168             | 8.780              | 6.586              | 5.157              | 2.253                       |
| PAGE5              | NM_001013435.1 | 2.512      | 2.220      | 1.746      | 4.326      | 3.845               | 4.611               | 3.433               | 9.463               | 12.826             | 11.111             | 1.954              | 79.497             | 5.866                       |
| IL21R              | NM_021798.2    | 3.252      | 2.821      | 3.158      | 5.262      | 13.125              | 3.755               | 4.051               | 8.158               | 3.793              | 7.691              | 8.575              | 3.805              | 1.827                       |

| Gene Symbol | ID              | HC1   | HC2   | HC3   | HC4   | w/o<br>LNM1 | w/o<br>LNM2 | w/o<br>LNM3 | w/o<br>LNM4 | w/<br>LNM1 | w/<br>LNM2 | w/<br>LNM3 | w/<br>LNM4 | FC<br>(ESCC vs. HC) |
|-------------|-----------------|-------|-------|-------|-------|-------------|-------------|-------------|-------------|------------|------------|------------|------------|---------------------|
| ZG16B       | ENST00000382280 | 4.403 | 7.976 | 5.505 | 5.385 | 6.705       | 16.451      | 7.452       | 9.108       | 6.767      | 12.480     | 8.403      | 9.572      | 1.653               |
| RPSA        | BC066941.1      | 2.879 | 2.183 | 2.158 | 2.249 | 2.026       | 3.722       | 5.462       | 11.275      | 4.252      | 2.985      | 6.109      | 6.261      | 2.223               |
| TEAD3       | BC027877.1      | 2.714 | 2.618 | 2.091 | 2.764 | 4.358       | 4.504       | 2.244       | 9.708       | 4.607      | 3.856      | 2.260      | 3.141      | 1.702               |
| Sp3         | BC079874        | 2.167 | 1.875 | 2.584 | 2.558 | 2.237       | 5.943       | 3.830       | 4.220       | 2.675      | 2.143      | 2.593      | 10.596     | 1.864               |
| KIAA0317    | BC032944.2      | 2.617 | 2.830 | 2.222 | 2.891 | 6.224       | 4.504       | 2.681       | 3.265       | 4.175      | 12.334     | 2.462      | 2.951      | 1.827               |
| OFD1        | BC099658.1      | 3.656 | 1.937 | 2.226 | 2.158 | 11.908      | 2.720       | 9.437       | 5.305       | 5.507      | 10.248     | 2.435      | 2.708      | 2.519               |
| THUMPD1     | NM_017736.3     | 2.773 | 3.143 | 1.854 | 2.944 | 3.901       | 18.712      | 2.675       | 3.677       | 473.087    | 2.088      | 150.213    | 50.600     | 32.899              |
| LRRC6       | BC027589.1      | 2.864 | 2.595 | 1.928 | 3.863 | 10.807      | 6.857       | 2.807       | 5.642       | 5.563      | 6.893      | 2.350      | 2.963      | 1.950               |
| CTAG1A      | NM_139250       | 2.363 | 3.105 | 1.965 | 2.233 | 4.134       | 3.829       | 9.575       | 2.578       | 3.074      | 2.940      | 2.293      | 2.528      | 1.601               |
| KCNA3       | NM_002232.3     | 3.236 | 2.387 | 2.393 | 2.588 | 2.351       | 4.738       | 5.481       | 8.816       | 4.288      | 3.288      | 7.150      | 4.034      | 1.893               |
| PPP1R13L    | BC064913.1      | 2.374 | 2.193 | 3.050 | 3.073 | 12.552      | 19.951      | 2.481       | 3.376       | 2.699      | 4.196      | 7.853      | 2.527      | 2.602               |
| SNX1        | NM_003099.3     | 3.572 | 2.069 | 2.593 | 4.510 | 2.054       | 8.848       | 21.533      | 12.537      | 4.678      | 3.603      | 2.770      | 5.323      | 2.407               |
| MAGEB6      | NM_173523.2     | 3.028 | 2.669 | 2.272 | 3.115 | 3.312       | 2.988       | 11.986      | 3.225       | 3.773      | 3.110      | 2.838      | 3.420      | 1.563               |
| CTRB2       | NM_001025200.3  | 2.344 | 3.330 | 2.015 | 3.525 | 7.665       | 3.812       | 2.684       | 4.312       | 3.958      | 4.727      | 3.564      | 2.935      | 1.501               |
| C2          | BC029781.1      | 3.274 | 3.865 | 2.223 | 4.371 | 8.125       | 6.800       | 2.914       | 5.365       | 5.912      | 5.592      | 4.329      | 3.624      | 1.553               |
| TMEM25      | BC051841.1      | 6.959 | 3.126 | 5.776 | 4.692 | 2.341       | 42.395      | 15.286      | 11.438      | 4.216      | 3.252      | 3.023      | 33.097     | 2.799               |
| C6orf106    | NM_024294.2     | 1.502 | 1.746 | 1.579 | 1.335 | 7.198       | 19.021      | 1.801       | 1.744       | 11.275     | 8.813      | 1.743      | 1.780      | 4.331               |
| SMEK1       | BC072409.1      | 2.013 | 2.143 | 2.075 | 1.893 | 2.600       | 23.613      | 1.959       | 3.379       | 6.965      | 4.856      | 45.027     | 2.259      | 5.580               |
| VPS35       | BC010362.1      | 2.622 | 2.494 | 2.104 | 2.215 | 6.437       | 4.266       | 2.455       | 2.778       | 3.194      | 14.703     | 2.431      | 2.637      | 2.062               |
| FUT6        | BC061700.1      | 1.683 | 2.313 | 1.735 | 2.360 | 4.811       | 2.298       | 2.484       | 3.530       | 2.396      | 3.221      | 3.103      | 2.446      | 1.501               |
| PIK3CA      | NM_006218.2     | 2.247 | 2.301 | 1.918 | 3.180 | 2.879       | 5.543       | 2.616       | 6.250       | 2.714      | 3.415      | 2.297      | 4.301      | 1.556               |
| PAGE2       | NM_207339.1     | 4.772 | 1.953 | 1.754 | 3.290 | 3.333       | 5.065       | 6.629       | 9.190       | 17.335     | 3.414      | 2.725      | 46.111     | 3.985               |
| ERMP1       | BC031630.1      | 2.792 | 3.700 | 2.415 | 4.322 | 11.543      | 4.365       | 3.315       | 6.355       | 4.216      | 5.501      | 6.820      | 4.256      | 1.753               |
| ZNF720      | BC055408.1      | 4.862 | 5.120 | 2.366 | 3.891 | 5.790       | 13.004      | 4.048       | 5.207       | 7.098      | 7.843      | 3.649      | 3.189      | 1.534               |
| ANKHD1      | NM_017978.1     | 2.979 | 3.868 | 1.877 | 1.694 | 3.052       | 3.018       | 12.204      | 35.719      | 2.588      | 4.807      | 2.257      | 34.375     | 4.704               |
| PICK1       | NM_012407.3     | 3.474 | 2.553 | 2.260 | 4.914 | 4.709       | 6.955       | 3.162       | 19.712      | 3.326      | 3.545      | 27.301     | 5.075      | 2.795               |
| ZNF641      | BC018090.1      | 3.430 | 3.748 | 2.375 | 2.154 | 4.464       | 8.209       | 3.512       | 3.385       | 5.656      | 4.194      | 4.469      | 2.599      | 1.558               |
| TCOF1       | NM_001008657.1  | 3.544 | 3.370 | 2.054 | 5.391 | 4.931       | 71.191      | 9.302       | 3.200       | 34.229     | 24.672     | 20.500     | 3.845      | 5.985               |
| GBP5        | NM_052942.2     | 5.527 | 4.678 | 2.489 | 4.623 | 3.861       | 28.221      | 3.009       | 42.038      | 5.435      | 8.200      | 13.848     | 2.672      | 3.098               |
| ST3GAL3     | NM_006279.2     | 4.763 | 3.811 | 2.646 | 6.063 | 15.148      | 5.865       | 4.508       | 9.486       | 5.667      | 5.814      | 8.642      | 4.475      | 1.724               |
| SPDL1       | NM_017785.2     | 3.493 | 3.101 | 3.901 | 2.761 | 3.089       | 8.244       | 10.735      | 3.411       | 7.247      | 17.435     | 31.742     | 5.579      | 3.299               |

| Gene Symbol | ID             | HC1   | HC2   | HC3   | HC4    | w/o<br>LNM1 | w/o<br>LNM2 | w/o<br>LNM3 | w/o<br>LNM4 | w/<br>LNM1 | w/<br>LNM2 | w/<br>LNM3 | w/<br>LNM4 | FC<br>(ESCC vs. HC) |
|-------------|----------------|-------|-------|-------|--------|-------------|-------------|-------------|-------------|------------|------------|------------|------------|---------------------|
| LAMP1       | NM_005561.3    | 5.649 | 6.432 | 2.409 | 9.832  | 14.443      | 7.300       | 6.416       | 16.127      | 15.690     | 6.624      | 8.533      | 6.946      | 1.687               |
| CLDN8       | NM_199328.1    | 4.075 | 3.240 | 2.394 | 4.882  | 10.362      | 4.025       | 4.243       | 6.274       | 4.792      | 3.963      | 7.239      | 4.254      | 1.547               |
| P2RX4       | BC033826.1     | 4.382 | 7.329 | 2.828 | 12.585 | 14.126      | 10.705      | 4.960       | 15.305      | 12.252     | 9.026      | 10.196     | 9.181      | 1.581               |
| GIF         | NM_005142.2    | 3.802 | 3.909 | 2.639 | 4.902  | 6.289       | 4.795       | 4.014       | 7.853       | 3.866      | 6.957      | 6.088      | 27.069     | 2.194               |
| TPM2        | NM_003289.3    | 5.233 | 5.397 | 4.170 | 9.241  | 5.369       | 4.870       | 15.191      | 14.909      | 44.130     | 6.207      | 39.102     | 7.845      | 2.862               |
| LAT         | NM_001014989.1 | 3.978 | 3.045 | 2.581 | 11.386 | 81.343      | 5.501       | 5.337       | 9.297       | 3.879      | 13.632     | 6.021      | 6.146      | 3.124               |
| ZNF428      | BC045799.1     | 4.886 | 9.844 | 3.578 | 4.432  | 5.887       | 6.027       | 5.931       | 89.333      | 5.118      | 10.237     | 7.025      | 7.183      | 3.007               |
| FAM43A      | NM_153690.4    | 2.335 | 2.258 | 2.034 | 3.170  | 3.444       | 2.229       | 3.867       | 18.768      | 3.577      | 11.170     | 11.461     | 2.196      | 2.894               |
| DCDC2       | Q9UHG0         | 4.382 | 2.498 | 2.047 | 2.267  | 5.682       | 4.923       | 2.483       | 13.302      | 5.376      | 3.060      | 5.488      | 2.394      | 1.908               |
| KIR3DS1     | NM_001083539.1 | 2.196 | 2.966 | 2.039 | 3.077  | 9.991       | 3.239       | 2.361       | 3.496       | 3.602      | 5.292      | 3.048      | 2.237      | 1.618               |
| TNNC2       | NM_003279.2    | 2.670 | 6.130 | 2.000 | 3.464  | 239.006     | 2.162       | 6.772       | 6.243       | 15.673     | 2.824      | 2.398      | 25.067     | 10.521              |
| IFNLR1      | NM_170743.2    | 3.063 | 2.254 | 2.473 | 3.527  | 12.958      | 2.615       | 3.540       | 4.663       | 2.781      | 2.721      | 5.612      | 4.517      | 1.741               |
| PUF60       | NM_014281.3    | 3.224 | 3.060 | 2.304 | 2.339  | 3.379       | 8.697       | 2.290       | 3.461       | 3.316      | 14.607     | 4.147      | 2.983      | 1.962               |
| PAG1        | NM_018440.3    | 2.078 | 1.933 | 2.243 | 5.571  | 30.320      | 1.951       | 5.166       | 13.961      | 2.644      | 4.421      | 10.764     | 11.434     | 3.411               |
| ATF6        | BC014969.1     | 2.298 | 3.903 | 2.614 | 2.624  | 26.634      | 16.387      | 2.167       | 3.648       | 6.683      | 6.242      | 2.648      | 2.070      | 2.906               |
| TMSB10      | NM_021103.3    | 3.263 | 1.935 | 2.296 | 2.102  | 1.838       | 3.137       | 11.521      | 6.610       | 4.562      | 3.158      | 17.189     | 2.007      | 2.607               |
| MZB1        | NM_016459.3    | 4.322 | 4.020 | 2.282 | 2.929  | 5.998       | 10.290      | 2.849       | 3.956       | 7.860      | 6.013      | 3.224      | 2.498      | 1.575               |
| NSG1        | NM_014392.3    | 2.908 | 5.300 | 2.964 | 4.996  | 9.164       | 9.450       | 2.974       | 4.410       | 3.723      | 14.917     | 12.721     | 3.260      | 1.875               |
| TIFA        | NM_052864.2    | 3.222 | 2.985 | 3.178 | 3.072  | 3.582       | 3.147       | 58.909      | 2.718       | 3.300      | 3.659      | 2.956      | 2.422      | 3.239               |
| FOLH1       | NM_001014986.1 | 3.104 | 3.352 | 2.330 | 4.579  | 9.593       | 4.311       | 2.976       | 6.255       | 5.244      | 5.671      | 6.071      | 4.540      | 1.671               |
| FAM131B     | BC045611.1     | 4.230 | 4.026 | 3.910 | 5.135  | 2.734       | 18.114      | 5.745       | 4.528       | 11.066     | 3.370      | 2.492      | 13.221     | 1.771               |
| PTMA        | NM_002823.2    | 2.334 | 1.903 | 2.042 | 1.922  | 1.542       | 1.648       | 129.886     | 4.638       | 3.628      | 3.081      | 4.423      | 2.693      | 9.239               |
| RBM12       | NM_006047.4    | 2.551 | 2.872 | 2.010 | 2.657  | 2.700       | 6.542       | 2.579       | 6.162       | 5.442      | 3.175      | 2.441      | 5.741      | 1.724               |
| SCGB1D1     | NM_006552.1    | 2.210 | 2.226 | 2.012 | 2.965  | 3.897       | 2.410       | 2.348       | 7.292       | 3.046      | 8.444      | 3.024      | 2.358      | 1.743               |
| GCG         | NM_002054.2    | 2.840 | 2.123 | 2.262 | 2.917  | 2.186       | 2.215       | 7.866       | 4.903       | 2.080      | 2.565      | 3.894      | 9.021      | 1.712               |
| FAM153A     | NM_173663.1    | 2.419 | 2.594 | 1.723 | 3.692  | 22.058      | 104.620     | 1.887       | 2.751       | 4.450      | 3.433      | 3.146      | 2.981      | 6.968               |
| STX10       | BC017237.2     | 2.713 | 2.933 | 2.420 | 3.012  | 2.941       | 19.395      | 2.366       | 3.158       | 11.019     | 4.347      | 8.081      | 2.369      | 2.423               |
| CPLX2       | NM_001008220.1 | 2.221 | 4.593 | 1.851 | 1.721  | 5.444       | 7.402       | 2.065       | 2.326       | 5.646      | 4.793      | 2.078      | 2.250      | 1.541               |
| TRIM24      | NM_015905.2    | 2.098 | 3.955 | 1.954 | 2.129  | 4.533       | 6.730       | 2.493       | 2.577       | 4.651      | 4.745      | 3.673      | 3.512      | 1.624               |
| RAD23B      | BC020973.2     | 2.458 | 2.901 | 2.366 | 6.002  | 2.640       | 7.305       | 69.280      | 2.806       | 7.316      | 9.120      | 11.904     | 37.760     | 5.396               |
| BACH1       | BC063307       | 2.889 | 3.030 | 8.966 | 2.515  | 7.873       | 2.935       | 4.564       | 4.592       | 13.341     | 38.809     | 16.844     | 10.877     | 2.869               |

| Gene Symbol | ID          | HC1    | HC2    | HC3   | HC4    | w/o<br>LNM1 | w/o<br>LNM2 | w/o<br>LNM3 | w/o<br>LNM4 | w/<br>LNM1 | w/<br>LNM2 | w/<br>LNM3 | w/<br>LNM4 | FC<br>(ESCC vs. HC) |
|-------------|-------------|--------|--------|-------|--------|-------------|-------------|-------------|-------------|------------|------------|------------|------------|---------------------|
| SH3GL2      | NM_003026.1 | 2.809  | 3.192  | 3.167 | 2.130  | 3.075       | 2.787       | 26.636      | 2.699       | 6.121      | 7.791      | 6.331      | 3.324      | 2.601               |
| ATXN3       | BC033711.1  | 11.373 | 5.177  | 4.120 | 3.540  | 5.214       | 29.918      | 3.568       | 12.114      | 92.147     | 34.882     | 25.934     | 11.438     | 4.445               |
| ZPR1        | NM_003904.3 | 4.668  | 3.860  | 2.990 | 4.430  | 3.550       | 6.365       | 3.584       | 3.039       | 4.884      | 35.133     | 6.189      | 6.535      | 2.172               |
| USH1C       | BC016057.1  | 2.844  | 2.279  | 2.850 | 2.011  | 2.371       | 5.727       | 4.343       | 2.254       | 4.275      | 9.847      | 14.711     | 3.488      | 2.354               |
| MAGEA2      | BC063681.1  | 2.263  | 2.144  | 1.796 | 2.409  | 3.137       | 2.036       | 2.422       | 2.638       | 3.098      | 3.240      | 2.618      | 8.597      | 1.613               |
| PI4K2B      | BC051749.1  | 2.260  | 2.171  | 2.015 | 3.624  | 3.257       | 2.058       | 2.570       | 4.522       | 3.376      | 4.171      | 3.849      | 13.751     | 1.865               |
| RNASET2     | NM_003730.3 | 2.115  | 2.311  | 2.478 | 2.922  | 3.219       | 2.940       | 2.615       | 3.059       | 3.059      | 3.119      | 11.202     | 2.920      | 1.635               |
| DPH2        | NM_001384.4 | 2.666  | 2.691  | 2.149 | 2.925  | 4.321       | 2.493       | 4.355       | 2.589       | 4.201      | 4.776      | 2.900      | 7.426      | 1.585               |
| ALPP        | NM_001632.3 | 2.118  | 2.188  | 2.043 | 2.684  | 3.824       | 2.245       | 2.697       | 4.321       | 2.661      | 4.587      | 4.015      | 3.961      | 1.567               |
| FAF1        | NM_007051.2 | 7.225  | 2.693  | 2.458 | 5.838  | 2.871       | 7.518       | 6.437       | 20.149      | 11.238     | 3.502      | 62.420     | 26.805     | 3.869               |
| IVNS1ABP    | BC067739    | 4.184  | 4.611  | 3.231 | 3.678  | 2.725       | 6.602       | 3.440       | 3.577       | 19.697     | 22.579     | 6.850      | 3.939      | 2.210               |
| SPA17       | NM_017425.2 | 1.874  | 2.185  | 1.710 | 2.003  | 1.836       | 3.714       | 1.941       | 1.891       | 4.030      | 5.428      | 1.777      | 12.951     | 2.160               |
| CRYL1       | NM_015974.2 | 2.916  | 2.807  | 1.871 | 2.589  | 3.945       | 3.664       | 2.141       | 2.771       | 3.119      | 5.862      | 18.161     | 2.461      | 2.068               |
| LAX1        | BC069650.1  | 3.307  | 1.746  | 3.097 | 4.061  | 3.157       | 2.249       | 2.229       | 9.260       | 2.502      | 6.099      | 18.716     | 5.322      | 2.028               |
| GPI         | NM_000175.2 | 3.572  | 2.291  | 1.915 | 2.557  | 2.441       | 3.309       | 3.600       | 2.705       | 2.542      | 6.195      | 9.301      | 5.893      | 1.741               |
| SESN2       | NM_031459.3 | 2.253  | 2.282  | 2.209 | 2.652  | 2.096       | 2.684       | 2.260       | 3.271       | 8.118      | 5.254      | 3.689      | 2.295      | 1.579               |
| ZSCAN20     | BC011404.2  | 2.285  | 2.788  | 2.018 | 2.057  | 2.664       | 3.565       | 2.370       | 2.174       | 6.717      | 3.314      | 6.365      | 2.232      | 1.607               |
| E2F6        | NM_212540.1 | 2.870  | 2.421  | 2.083 | 2.885  | 5.970       | 3.577       | 2.371       | 2.443       | 3.561      | 4.602      | 2.740      | 7.388      | 1.591               |
| C11orf73    | BC018080.1  | 3.660  | 3.598  | 2.321 | 3.537  | 44.015      | 3.129       | 2.757       | 3.624       | 4.297      | 4.185      | 8.612      | 3.111      | 2.811               |
| WDR66       | BC036233.1  | 2.215  | 2.819  | 1.899 | 2.108  | 3.864       | 2.986       | 3.474       | 3.154       | 15.747     | 3.789      | 2.967      | 2.497      | 2.128               |
| WRAP53      | BC002336.2  | 2.698  | 2.734  | 2.150 | 3.415  | 7.962       | 2.494       | 2.534       | 3.958       | 3.336      | 4.368      | 3.234      | 8.300      | 1.645               |
| SNRNP70     | NM_003089.4 | 2.460  | 2.457  | 2.285 | 2.209  | 2.953       | 4.446       | 2.465       | 3.015       | 2.878      | 5.832      | 4.692      | 2.264      | 1.517               |
| FAM84A      | BC026346.1  | 27.762 | 34.167 | 9.797 | 14.456 | 39.402      | 33.482      | 14.316      | 17.838      | 71.358     | 112.712    | 37.048     | 23.380     | 2.028               |
| BTN1A1      | BC096312.3  | 2.786  | 2.151  | 1.912 | 3.064  | 2.837       | 2.772       | 2.830       | 3.975       | 3.071      | 3.167      | 2.847      | 10.610     | 1.619               |
| PSMA3       | NM_002788.2 | 4.406  | 4.016  | 2.381 | 4.364  | 6.410       | 4.937       | 3.521       | 4.043       | 7.781      | 99.246     | 5.133      | 4.404      | 4.466               |
| C1orf94     | NM_032884.2 | 3.641  | 3.888  | 2.711 | 11.565 | 5.539       | 4.214       | 5.038       | 5.059       | 41.171     | 57.236     | 4.912      | 4.501      | 2.928               |
| KRTAP19-3   | NM_181609   | 3.139  | 4.039  | 2.984 | 7.552  | 4.722       | 4.314       | 5.153       | 3.627       | 20.944     | 20.927     | 4.014      | 4.007      | 1.911               |
| MPPED2      | NM_001584.1 | 2.672  | 2.374  | 2.059 | 3.744  | 4.154       | 2.747       | 2.822       | 2.938       | 9.385      | 10.322     | 2.675      | 3.156      | 1.760               |
| TRIM55      | NM_184086.1 | 2.363  | 2.661  | 2.751 | 4.279  | 2.999       | 3.091       | 3.084       | 4.118       | 3.069      | 10.156     | 8.087      | 3.509      | 1.581               |
| AMBN        | NM_016519.4 | 2.210  | 2.665  | 1.936 | 3.760  | 6.053       | 3.110       | 2.429       | 3.370       | 2.902      | 7.149      | 6.003      | 3.753      | 1.644               |
| DLG4        | NM_001365.1 | 1.766  | 2.706  | 1.924 | 2.364  | 2.269       | 3.662       | 3.371       | 3.133       | 4.702      | 2.171      | 2.852      | 6.605      | 1.642               |

| <b>Gene Symbol</b> | <b>ID</b>   | <b>HC1</b> | <b>HC2</b> | <b>HC3</b> | <b>HC4</b> | <b>w/o<br/>LNM1</b> | <b>w/o<br/>LNM2</b> | <b>w/o<br/>LNM3</b> | <b>w/o<br/>LNM4</b> | <b>w/<br/>LNM1</b> | <b>w/<br/>LNM2</b> | <b>w/<br/>LNM3</b> | <b>w/<br/>LNM4</b> | <b>FC<br/>(ESCC vs. HC)</b> |
|--------------------|-------------|------------|------------|------------|------------|---------------------|---------------------|---------------------|---------------------|--------------------|--------------------|--------------------|--------------------|-----------------------------|
| SYAP1              | NM_032796.2 | 2.543      | 3.453      | 2.337      | 2.709      | 2.724               | 11.687              | 2.718               | 2.995               | 4.093              | 5.433              | 2.647              | 9.269              | 1.882                       |
| TOM1               | BC046151.1  | 3.887      | 4.926      | 2.777      | 4.868      | 8.820               | 7.535               | 3.082               | 4.194               | 47.771             | 4.591              | 14.211             | 2.745              | 2.824                       |
| SPSB2              | NM_032641.1 | 3.065      | 2.747      | 2.167      | 2.913      | 4.324               | 4.504               | 2.578               | 2.811               | 3.494              | 10.948             | 2.833              | 2.292              | 1.551                       |
| MAGEA1             | BC017555    | 5.730      | 4.220      | 2.171      | 11.147     | 8.791               | 5.427               | 149.141             | 7.948               | 5.233              | 6.595              | 5.075              | 114.449            | 6.504                       |
| NASP               | NM_002482.2 | 3.975      | 3.003      | 2.981      | 13.443     | 14.783              | 6.757               | 4.955               | 4.404               | 11.837             | 4.871              | 4.765              | 22.874             | 1.608                       |
| ND                 | BC013935.1  | 2.788      | 3.307      | 3.036      | 5.210      | 4.179               | 5.444               | 2.931               | 4.354               | 4.161              | 12.649             | 8.700              | 3.882              | 1.614                       |
| IGHG1              | BC075842.1  | 18.785     | 32.346     | 17.771     | 12.735     | 29.520              | 34.780              | 27.732              | 22.588              | 43.408             | 41.017             | 31.411             | 17.194             | 1.517                       |
| ZNF606             | BC037209.1  | 3.564      | 3.026      | 2.293      | 3.316      | 5.412               | 5.064               | 2.891               | 3.284               | 4.161              | 12.052             | 2.568              | 2.875              | 1.570                       |

**Supplementary Table S6.** The differentially expressed IgG autoantibodies between T1-stage ESCC that with or without lymph node metastasis

| Gene Symbol | ID             | w/o    | w/o    | w/o    | w/o    | w/      | w/     | w/      | w/     | FC<br>(w/ LNM vs. w/o LNM) |
|-------------|----------------|--------|--------|--------|--------|---------|--------|---------|--------|----------------------------|
|             |                | LNM1   | LNM2   | LNM3   | LNM4   | LNM1    | LNM2   | LNM3    | LNM4   |                            |
| BACH1       | BC063307       | 7.873  | 2.935  | 4.564  | 4.592  | 13.341  | 38.809 | 16.844  | 10.877 | 4.001                      |
| UBL7        | NM_032907.3    | 1.789  | 2.037  | 2.228  | 1.367  | 2.524   | 7.404  | 15.848  | 3.808  | 3.986                      |
| NUB1        | NM_016118.3    | 2.277  | 2.297  | 2.168  | 2.101  | 6.935   | 2.909  | 3.756   | 2.691  | 1.842                      |
| PSMA3       | NM_002788.2    | 3.306  | 4.843  | 3.932  | 3.981  | 5.604   | 81.807 | 4.639   | 5.279  | 6.060                      |
| LMOD3       | BC039202.1     | 1.907  | 2.347  | 2.217  | 2.570  | 3.624   | 5.174  | 6.962   | 2.505  | 2.020                      |
| AKAP5       | NM_004857.2    | 1.959  | 1.959  | 1.986  | 2.318  | 4.753   | 3.093  | 3.250   | 2.235  | 1.622                      |
| THUMPDI     | NM_017736.3    | 3.901  | 18.712 | 2.675  | 3.677  | 473.087 | 2.088  | 150.213 | 50.600 | 23.338                     |
| ELP5        | BC002762.2     | 4.516  | 2.626  | 2.301  | 3.722  | 8.889   | 45.068 | 21.211  | 3.862  | 6.003                      |
| RAB11FIP1   | NM_001002233.1 | 12.756 | 14.134 | 5.013  | 22.019 | 98.583  | 52.963 | 96.092  | 12.579 | 4.826                      |
| SH3BP1      | BC008282       | 1.786  | 7.088  | 8.790  | 6.772  | 19.018  | 30.835 | 44.588  | 6.982  | 4.151                      |
| RNF25       | NM_022453.2    | 2.584  | 2.516  | 2.267  | 2.863  | 2.508   | 3.539  | 31.160  | 3.230  | 3.953                      |
| UBE2G1      | NM_003342.4    | 2.289  | 2.372  | 2.384  | 2.802  | 28.828  | 3.028  | 3.710   | 2.140  | 3.829                      |
| NAP1L3      | BC034954.2     | 3.587  | 3.101  | 2.323  | 2.334  | 13.847  | 6.739  | 5.898   | 2.242  | 2.532                      |
| ZNF503      | NM_032772.3    | 2.350  | 2.039  | 2.584  | 2.568  | 6.047   | 9.334  | 2.332   | 6.078  | 2.493                      |
| KCNRG       | NM_173605.1    | 2.823  | 2.649  | 2.776  | 3.172  | 5.461   | 7.378  | 11.545  | 2.808  | 2.381                      |
| TXLNB       | AL834248       | 3.548  | 3.775  | 2.569  | 2.315  | 15.424  | 4.183  | 2.925   | 6.443  | 2.374                      |
| EPN1        | NM_013333.2    | 3.629  | 5.179  | 6.868  | 7.348  | 10.033  | 10.259 | 25.069  | 3.235  | 2.111                      |
| EYA1        | BC121798       | 5.990  | 11.779 | 13.301 | 9.684  | 40.958  | 19.492 | 19.623  | 5.912  | 2.110                      |
| GPI         | NM_000175.2    | 2.441  | 3.309  | 3.600  | 2.705  | 2.542   | 6.195  | 9.301   | 5.893  | 1.985                      |
| GNPTG       | BC014592.1     | 3.510  | 1.895  | 2.352  | 2.529  | 4.084   | 5.503  | 8.062   | 2.056  | 1.915                      |
| SESN2       | NM_031459.3    | 2.096  | 2.684  | 2.260  | 3.271  | 8.118   | 5.254  | 3.689   | 2.295  | 1.877                      |
| PPAPDC3     | NM_032728.2    | 2.839  | 2.548  | 2.598  | 3.165  | 3.523   | 4.824  | 2.811   | 8.108  | 1.728                      |
| C4BPB       | NM_001017367.1 | 2.333  | 1.523  | 2.434  | 2.089  | 3.936   | 4.932  | 3.105   | 2.140  | 1.685                      |
| NAP1L5      | NM_153757.1    | 1.979  | 2.453  | 2.614  | 2.613  | 3.266   | 3.167  | 5.663   | 2.601  | 1.522                      |
| MYLK        | NM_053031.2    | 3.199  | 5.016  | 3.886  | 4.892  | 8.265   | 6.441  | 3.579   | 7.504  | 1.518                      |
| PDIA2       | NM_006849      | 4.180  | 3.429  | 4.459  | 5.800  | 7.088   | 7.336  | 8.829   | 3.620  | 1.504                      |
| FADD        | NM_003824.2    | 1.876  | 2.244  | 2.271  | 2.058  | 49.218  | 2.270  | 2.621   | 3.981  | 6.876                      |
| ZPR1        | NM_003904.3    | 3.550  | 6.365  | 3.584  | 3.039  | 4.884   | 35.133 | 6.189   | 6.535  | 3.189                      |
| CCNJL       | BC013353.2     | 2.297  | 2.431  | 3.253  | 2.349  | 7.184   | 13.524 | 2.736   | 2.682  | 2.529                      |
| KRTAP26-1   | NM_203405.1    | 1.844  | 1.463  | 2.211  | 1.919  | 4.916   | 6.995  | 2.071   | 2.084  | 2.160                      |

| <b>Gene Symbol</b> | <b>ID</b>      | <b>w/o<br/>LNM1</b> | <b>w/o<br/>LNM2</b> | <b>w/o<br/>LNM3</b> | <b>w/o<br/>LNM4</b> | <b>w/<br/>LNM1</b> | <b>w/<br/>LNM2</b> | <b>w/<br/>LNM3</b> | <b>w/<br/>LNM4</b> | <b>FC<br/>(w/ LNM vs. w/o LNM)</b> |
|--------------------|----------------|---------------------|---------------------|---------------------|---------------------|--------------------|--------------------|--------------------|--------------------|------------------------------------|
| PIAS2              | NM_004671.2    | 2.081               | 1.690               | 1.881               | 1.854               | 7.717              | 2.656              | 3.633              | 2.060              | 2.140                              |
| JAM2               | NM_021219.2    | 2.758               | 2.454               | 2.234               | 3.480               | 2.947              | 7.606              | 8.709              | 3.049              | 2.042                              |
| C20orf112          | BC065370.1     | 1.673               | 1.620               | 1.921               | 1.695               | 1.773              | 3.981              | 1.901              | 4.991              | 1.831                              |
| CLGN               | NM_004362.1    | 2.010               | 1.773               | 2.377               | 2.204               | 2.299              | 3.698              | 2.263              | 6.564              | 1.773                              |
| SLC25A39           | NM_016016.1    | 1.860               | 1.940               | 2.016               | 1.785               | 3.601              | 5.820              | 2.074              | 1.963              | 1.771                              |
| ARSA               | BC014210.2     | 1.875               | 1.520               | 2.028               | 1.615               | 3.609              | 4.342              | 1.958              | 2.028              | 1.696                              |
| GPX1               | BC070258.1     | 1.909               | 1.785               | 1.957               | 1.879               | 3.238              | 4.296              | 2.035              | 1.944              | 1.529                              |
| MLST8              | BC020499.1     | 2.039               | 1.997               | 2.306               | 1.859               | 3.593              | 4.406              | 2.169              | 2.171              | 1.505                              |
| GGA1               | NM_001001561.1 | 2.220               | 2.531               | 2.367               | 2.051               | 1.960              | 49.593             | 2.925              | 4.730              | 6.457                              |
| BCL2L11            | NM_138627.2    | 1.682               | 2.429               | 2.345               | 2.149               | 2.591              | 18.022             | 8.601              | 2.205              | 3.651                              |
| BAP1               | NM_004656.2    | 2.145               | 2.108               | 2.037               | 2.071               | 17.390             | 4.528              | 2.287              | 2.036              | 3.138                              |
| ZBTB7A             | BC084568.1     | 1.920               | 2.308               | 1.855               | 1.958               | 2.028              | 6.438              | 5.904              | 2.534              | 2.102                              |
| CTBP2              | BC037900.2     | 2.039               | 1.779               | 2.252               | 2.251               | 4.690              | 2.492              | 2.223              | 7.006              | 1.972                              |
| ANGPT1             | BC029406.1     | 1.759               | 1.452               | 1.871               | 1.873               | 3.462              | 5.725              | 1.911              | 1.830              | 1.859                              |
| AAGAB              | BC058886.1     | 2.747               | 2.647               | 2.648               | 2.195               | 2.969              | 7.419              | 4.956              | 2.429              | 1.736                              |
| PEX7               | BC031606.1     | 2.540               | 2.025               | 2.516               | 2.485               | 3.682              | 6.741              | 2.649              | 2.343              | 1.611                              |
| ART4               | NM_021071.2    | 2.256               | 1.837               | 2.204               | 2.185               | 3.562              | 4.770              | 2.328              | 2.161              | 1.512                              |
| MAGI1              | NM_004742      | 7.942               | 15.006              | 7.436               | 4.631               | 10.341             | 12.839             | 12.031             | 34.887             | 2.002                              |
| IVNS1ABP           | BC067739       | 2.725               | 6.602               | 3.440               | 3.577               | 19.697             | 22.579             | 6.850              | 3.939              | 3.247                              |
| ZSCAN5A            | BC043232.1     | 2.474               | 2.965               | 3.995               | 2.758               | 2.887              | 5.743              | 4.305              | 6.734              | 1.613                              |
| PAGE5              | NM_001013435.1 | 3.845               | 4.611               | 3.433               | 9.463               | 12.826             | 11.111             | 1.954              | 79.497             | 4.936                              |
| SPA17              | NM_017425.2    | 1.836               | 3.714               | 1.941               | 1.891               | 4.030              | 5.428              | 1.777              | 12.951             | 2.578                              |
| RBPJ               | NM_203284.1    | 14.436              | 23.153              | 14.671              | 19.265              | 24.926             | 68.074             | 34.968             | 8.152              | 1.903                              |
| PODNL1             | NM_024825.2    | 4.289               | 4.445               | 5.664               | 4.703               | 7.649              | 17.810             | 6.058              | 3.552              | 1.836                              |
| AFAP1L2            | NM_001001936.1 | 5.565               | 4.294               | 1.947               | 2.346               | 6.482              | 8.483              | 5.567              | 2.650              | 1.638                              |
| ATP5B              | NM_001686.3    | 5.218               | 3.802               | 3.096               | 4.788               | 6.024              | 5.410              | 2.968              | 57.335             | 4.244                              |
| MGC34796           | BC034822.1     | 3.924               | 2.889               | 3.838               | 3.471               | 20.780             | 28.706             | 4.021              | 3.176              | 4.014                              |
| PPM1G              | NM_002707.3    | 3.883               | 3.588               | 2.196               | 2.853               | 12.550             | 9.585              | 3.887              | 1.852              | 2.226                              |
| LASP1              | NM_006148.1    | 2.225               | 2.200               | 1.944               | 5.202               | 2.724              | 55.473             | 19.498             | 2.382              | 6.921                              |
| BOP1               | NM_015201.3    | 2.427               | 1.857               | 2.238               | 1.982               | 2.434              | 3.134              | 28.766             | 2.139              | 4.288                              |
| TRIM22             | NM_006074.3    | 1.610               | 1.509               | 1.926               | 1.749               | 1.781              | 18.444             | 6.742              | 1.879              | 4.246                              |

| <b>Gene Symbol</b> | <b>ID</b>      | <b>w/o<br/>LNM1</b> | <b>w/o<br/>LNM2</b> | <b>w/o<br/>LNM3</b> | <b>w/o<br/>LNM4</b> | <b>w/<br/>LNM1</b> | <b>w/<br/>LNM2</b> | <b>w/<br/>LNM3</b> | <b>w/<br/>LNM4</b> | <b>FC<br/>(w/ LNM vs. w/o LNM)</b> |
|--------------------|----------------|---------------------|---------------------|---------------------|---------------------|--------------------|--------------------|--------------------|--------------------|------------------------------------|
| GUK1               | NM_000858.4    | 1.772               | 3.249               | 2.676               | 2.308               | 2.722              | 13.381             | 18.149             | 2.829              | 3.706                              |
| ATXN3              | BC033711.1     | 5.214               | 29.918              | 3.568               | 12.114              | 92.147             | 34.882             | 25.934             | 11.438             | 3.235                              |
| TCF7L1             | TCF7L1         | 2.796               | 2.412               | 2.522               | 3.740               | 3.190              | 4.915              | 2.846              | 15.686             | 2.322                              |
| USH1C              | BC016057.1     | 2.371               | 5.727               | 4.343               | 2.254               | 4.275              | 9.847              | 14.711             | 3.488              | 2.200                              |
| ACSL4              | NM_022977.1    | 5.349               | 3.436               | 2.410               | 3.451               | 3.860              | 16.053             | 3.569              | 7.798              | 2.136                              |
| C12orf45           | BC032326.1     | 1.472               | 4.628               | 3.975               | 1.703               | 7.225              | 3.332              | 11.170             | 3.387              | 2.132                              |
| BCOR               | NM_020926.2    | 3.103               | 2.045               | 2.654               | 2.176               | 6.887              | 8.589              | 2.490              | 2.575              | 2.059                              |
| RAB27A             | NM_004580.3    | 1.792               | 2.671               | 1.947               | 1.698               | 6.839              | 2.011              | 4.892              | 1.972              | 1.938                              |
| MED22              | NM_133640.3    | 6.189               | 9.994               | 4.341               | 5.227               | 17.923             | 5.751              | 7.606              | 17.238             | 1.884                              |
| IRAK1BP1           | NM_001010844.1 | 2.038               | 3.446               | 2.469               | 2.529               | 2.880              | 6.091              | 7.469              | 2.563              | 1.813                              |
| METTL15            | BC030997.1     | 2.065               | 1.757               | 1.906               | 1.798               | 3.585              | 5.805              | 1.975              | 1.854              | 1.757                              |
| MAGEA2             | BC063681.1     | 3.137               | 2.036               | 2.422               | 2.638               | 3.098              | 3.240              | 2.618              | 8.597              | 1.715                              |
| KLHL26             | BC026319       | 2.595               | 1.800               | 2.045               | 2.054               | 2.267              | 6.889              | 3.241              | 2.141              | 1.712                              |
| RPAIN              | BC046349.1     | 2.079               | 2.295               | 2.640               | 2.757               | 4.854              | 5.579              | 2.595              | 2.616              | 1.601                              |
| TXNDC2             | BC050132       | 3.398               | 6.796               | 3.029               | 3.052               | 6.407              | 7.926              | 8.028              | 3.393              | 1.582                              |
| HSF2               | BC121050       | 1.801               | 1.894               | 2.532               | 2.039               | 2.459              | 4.726              | 3.128              | 2.155              | 1.508                              |
| ATP6V1B1           | BC035978.1     | 2.763               | 2.114               | 2.779               | 3.572               | 4.390              | 6.535              | 3.062              | 2.935              | 1.507                              |
| WBSCR27            | BC030295.2     | 2.684               | 2.313               | 2.300               | 1.968               | 13.555             | 21.005             | 2.600              | 2.147              | 4.243                              |
| GDI1               | NM_001493.1    | 2.348               | 3.420               | 5.401               | 3.356               | 6.270              | 20.152             | 4.570              | 2.415              | 2.300                              |
| DTNBP1             | NM_183041.1    | 2.098               | 4.700               | 3.194               | 2.577               | 4.216              | 14.357             | 4.802              | 2.049              | 2.023                              |
| ASMTL              | BC002508.2     | 2.693               | 3.113               | 2.756               | 2.784               | 2.939              | 8.975              | 8.233              | 2.767              | 2.020                              |
| WDR4               | NM_018669.4    | 2.354               | 2.126               | 1.901               | 2.113               | 8.883              | 2.354              | 3.901              | 2.015              | 2.019                              |
| CD83               | BC030830.1     | 2.313               | 2.563               | 2.175               | 2.259               | 2.545              | 6.619              | 7.474              | 2.078              | 2.010                              |
| UROS               | NM_000375.1    | 1.645               | 2.352               | 2.187               | 2.154               | 3.472              | 7.859              | 2.086              | 2.341              | 1.890                              |
| TRIM55             | NM_184086.1    | 2.999               | 3.091               | 3.084               | 4.118               | 3.069              | 10.156             | 8.087              | 3.509              | 1.867                              |
| GNB1L              | NM_053004.1    | 2.463               | 2.838               | 2.600               | 2.480               | 5.724              | 7.991              | 2.723              | 2.485              | 1.823                              |
| ZSCAN20            | BC011404.2     | 2.664               | 3.565               | 2.370               | 2.174               | 6.717              | 3.314              | 6.365              | 2.232              | 1.729                              |
| PSMC3              | NM_002804.3    | 4.499               | 5.713               | 2.844               | 4.351               | 5.273              | 10.947             | 4.096              | 8.907              | 1.679                              |
| KLK13              | NM_015596.1    | 1.872               | 1.850               | 2.374               | 2.042               | 1.856              | 4.400              | 4.558              | 2.355              | 1.618                              |
| PDSS1              | BC063635.1     | 1.937               | 1.982               | 2.086               | 1.914               | 1.942              | 4.532              | 3.781              | 2.080              | 1.558                              |
| TWF1               | NM_002822.3    | 2.359               | 2.467               | 2.359               | 2.664               | 2.749              | 5.880              | 4.158              | 2.108              | 1.513                              |



| <b>Gene Symbol</b> | <b>ID</b>       | <b>w/o<br/>LNM1</b> | <b>w/o<br/>LNM2</b> | <b>w/o<br/>LNM3</b> | <b>w/o<br/>LNM4</b> | <b>w/<br/>LNM1</b> | <b>w/<br/>LNM2</b> | <b>w/<br/>LNM3</b> | <b>w/<br/>LNM4</b> | <b>FC<br/>(w/ LNM vs. w/o LNM)</b> |
|--------------------|-----------------|---------------------|---------------------|---------------------|---------------------|--------------------|--------------------|--------------------|--------------------|------------------------------------|
| MAGEA12            | NM_005367.4     | 2.614               | 3.069               | 2.695               | 3.121               | 2.724              | 3.433              | 2.855              | 64.327             | 6.378                              |
| C1orf94            | NM_032884.2     | 5.539               | 4.214               | 5.038               | 5.059               | 41.171             | 57.236             | 4.912              | 4.501              | 5.432                              |
| SIRT1              | BC012499.1      | 2.970               | 13.285              | 17.076              | 6.468               | 117.484            | 5.359              | 65.943             | 14.080             | 5.097                              |
| TARBP2             | NM_134323.1     | 2.420               | 2.504               | 2.485               | 2.933               | 41.323             | 3.755              | 2.084              | 2.204              | 4.774                              |
| SNAP91             | NM_014841.1     | 2.688               | 3.098               | 2.042               | 2.037               | 5.245              | 36.853             | 1.846              | 1.803              | 4.638                              |
| TIRAP              | NM_148910.2     | 3.202               | 2.460               | 2.424               | 3.453               | 2.536              | 26.475             | 17.666             | 2.361              | 4.250                              |
| KCTD5              | NM_018992.1     | 2.213               | 2.179               | 2.089               | 2.086               | 29.085             | 3.245              | 1.853              | 1.798              | 4.200                              |
| AK6                | NM_016283.4     | 3.508               | 4.814               | 6.305               | 3.908               | 5.135              | 15.427             | 2.855              | 50.832             | 4.006                              |
| TTK                | NM_003318.3     | 2.343               | 2.123               | 2.397               | 2.604               | 2.122              | 3.663              | 28.686             | 2.261              | 3.880                              |
| PSMB4              | BC000331.1      | 3.474               | 3.016               | 4.001               | 2.491               | 17.464             | 25.843             | 3.050              | 2.885              | 3.793                              |
| PDXK               | BC003651.2      | 3.563               | 3.368               | 2.676               | 2.491               | 14.625             | 21.473             | 2.532              | 2.219              | 3.376                              |
| FMN1               | BC103692.1      | 2.377               | 15.749              | 12.122              | 5.623               | 11.716             | 69.891             | 4.005              | 23.119             | 3.031                              |
| SPACA7             | BC016750.2      | 4.905               | 5.359               | 2.519               | 3.222               | 33.928             | 3.295              | 8.233              | 2.984              | 3.027                              |
| TOM1               | BC046151.1      | 8.820               | 7.535               | 3.082               | 4.194               | 47.771             | 4.591              | 14.211             | 2.745              | 2.933                              |
| PAGE2              | NM_207339.1     | 3.333               | 5.065               | 6.629               | 9.190               | 17.335             | 3.414              | 2.725              | 46.111             | 2.873                              |
| KRTAP19-3          | NM_181609       | 4.722               | 4.314               | 5.153               | 3.627               | 20.944             | 20.927             | 4.014              | 4.007              | 2.800                              |
| GARS               | ENST00000389266 | 2.804               | 4.357               | 3.250               | 3.753               | 3.258              | 5.913              | 25.833             | 3.057              | 2.687                              |
| SEMA4G             | BC020960.1      | 3.103               | 2.528               | 2.807               | 2.357               | 10.493             | 13.681             | 2.526              | 2.232              | 2.680                              |
| STK33              | BC031231.1      | 2.084               | 1.952               | 2.606               | 2.040               | 2.237              | 3.316              | 14.984             | 1.891              | 2.583                              |
| KIAA1598           | BC022348.1      | 2.724               | 6.603               | 7.551               | 4.565               | 34.887             | 4.471              | 4.502              | 11.190             | 2.567                              |
| TNS1               | BC051304.1      | 2.847               | 5.762               | 2.267               | 2.395               | 9.870              | 2.583              | 2.428              | 18.284             | 2.499                              |
| SERPINI2           | NM_006217.3     | 2.528               | 2.710               | 2.207               | 2.249               | 2.544              | 3.539              | 2.332              | 15.695             | 2.487                              |
| SPDL1              | NM_017785.2     | 3.089               | 8.244               | 10.735              | 3.411               | 7.247              | 17.435             | 31.742             | 5.579              | 2.434                              |
| TPM2               | NM_003289.3     | 5.369               | 4.870               | 15.191              | 14.909              | 44.130             | 6.207              | 39.102             | 7.845              | 2.412                              |
| UBE3A              | BC002582.2      | 2.215               | 2.117               | 2.763               | 2.989               | 2.522              | 4.773              | 14.925             | 2.092              | 2.411                              |
| MBIP               | BC005197.1      | 3.601               | 2.685               | 2.131               | 2.333               | 13.696             | 7.006              | 2.771              | 2.139              | 2.383                              |
| SNX9               | NM_016224.3     | 3.730               | 3.100               | 3.985               | 5.259               | 7.653              | 23.221             | 4.349              | 2.950              | 2.375                              |
| CRYL1              | NM_015974.2     | 3.945               | 3.664               | 2.141               | 2.771               | 3.119              | 5.862              | 18.161             | 2.461              | 2.364                              |
| SLC7A6OS           | BC013778.1      | 2.269               | 6.680               | 6.723               | 8.625               | 14.395             | 3.985              | 6.223              | 32.350             | 2.344                              |
| LOC402578          | XM_380135.2     | 3.344               | 2.173               | 2.171               | 1.833               | 5.724              | 12.465             | 1.917              | 2.154              | 2.338                              |
| AK7                | BC035256.1      | 2.571               | 5.685               | 2.122               | 2.549               | 11.613             | 3.736              | 12.660             | 2.110              | 2.330                              |

| <b>Gene Symbol</b> | <b>ID</b>   | <b>w/o<br/>LNM1</b> | <b>w/o<br/>LNM2</b> | <b>w/o<br/>LNM3</b> | <b>w/o<br/>LNM4</b> | <b>w/<br/>LNM1</b> | <b>w/<br/>LNM2</b> | <b>w/<br/>LNM3</b> | <b>w/<br/>LNM4</b> | <b>FC<br/>(w/ LNM vs. w/o LNM)</b> |
|--------------------|-------------|---------------------|---------------------|---------------------|---------------------|--------------------|--------------------|--------------------|--------------------|------------------------------------|
| FAM84A             | BC026346.1  | 39.402              | 33.482              | 14.316              | 17.838              | 71.358             | 112.712            | 37.048             | 23.380             | 2.328                              |
| RBFOX2             | BC013115.1  | 3.512               | 2.412               | 2.897               | 3.328               | 8.787              | 13.251             | 3.279              | 2.959              | 2.327                              |
| SMUG1              | BC000417.2  | 3.052               | 2.367               | 2.797               | 2.260               | 7.991              | 11.232             | 2.623              | 2.140              | 2.290                              |
| SPRTN              | BC015740.1  | 2.265               | 1.946               | 2.921               | 2.155               | 4.998              | 11.320             | 2.423              | 2.208              | 2.256                              |
| C6orf1             | BC047919.1  | 2.883               | 2.728               | 3.317               | 2.775               | 8.362              | 12.466             | 2.761              | 2.666              | 2.243                              |
| TRIM16             | NM_006470.3 | 2.715               | 1.965               | 2.693               | 3.268               | 6.475              | 1.975              | 12.665             | 2.535              | 2.222                              |
| TGIF2LX            | NM_138960.3 | 2.008               | 2.327               | 2.017               | 2.281               | 2.166              | 6.616              | 8.292              | 1.893              | 2.197                              |
| LYPD3              | NM_014400.2 | 2.400               | 2.175               | 2.249               | 2.071               | 2.228              | 8.125              | 6.818              | 1.981              | 2.153                              |
| SLC25A28           | NM_031212.2 | 2.187               | 1.775               | 2.148               | 2.001               | 5.047              | 8.245              | 1.928              | 2.061              | 2.131                              |
| C9orf24            | NM_032596.3 | 6.986               | 3.231               | 3.680               | 3.843               | 12.027             | 19.194             | 3.382              | 2.684              | 2.102                              |
| ARL2BP             | BC094878.1  | 1.538               | 2.866               | 2.645               | 2.165               | 2.063              | 7.931              | 7.193              | 2.168              | 2.101                              |
| LOC494141          | BC034967.1  | 2.799               | 2.278               | 2.334               | 2.263               | 6.307              | 8.930              | 2.249              | 2.148              | 2.029                              |
| MPPED2             | NM_001584.1 | 4.154               | 2.747               | 2.822               | 2.938               | 9.385              | 10.322             | 2.675              | 3.156              | 2.017                              |
| BCAS2              | NM_005872.2 | 6.025               | 3.369               | 2.826               | 2.326               | 9.537              | 12.809             | 4.257              | 2.264              | 1.984                              |
| Ucp3               | BC008392.1  | 2.556               | 2.006               | 2.639               | 2.950               | 5.378              | 9.131              | 2.683              | 2.448              | 1.935                              |
| MTMR4              | NM_004687.3 | 2.069               | 2.284               | 2.033               | 1.774               | 1.822              | 7.566              | 1.878              | 4.378              | 1.917                              |
| KRTAP13-1          | BC113538.1  | 2.211               | 1.859               | 2.466               | 2.001               | 4.440              | 7.842              | 1.990              | 2.031              | 1.910                              |
| RHOXF2             | NM_032498.1 | 5.030               | 4.271               | 3.492               | 4.343               | 11.283             | 13.974             | 3.889              | 3.568              | 1.909                              |
| C2orf15            | NM_144706.2 | 3.782               | 2.599               | 2.766               | 3.771               | 13.425             | 4.688              | 3.032              | 2.853              | 1.858                              |
| CABP4              | BC033167.1  | 2.419               | 2.606               | 2.299               | 1.984               | 2.312              | 7.017              | 5.729              | 2.227              | 1.857                              |
| MPZL1              | BC019890.1  | 2.568               | 3.050               | 2.314               | 2.298               | 6.603              | 7.893              | 2.234              | 2.180              | 1.848                              |
| NCAPG2             | BC020560.1  | 2.209               | 1.974               | 2.355               | 2.360               | 4.332              | 7.239              | 2.335              | 2.278              | 1.819                              |
| LOC389687          | XM_374281.1 | 3.567               | 2.219               | 2.673               | 3.064               | 5.532              | 9.307              | 3.138              | 2.505              | 1.778                              |
| CTDP1              | NM_004715.4 | 3.193               | 2.974               | 2.287               | 2.407               | 7.966              | 6.328              | 1.984              | 2.931              | 1.769                              |
| C1orf158           | NM_152290.1 | 4.778               | 2.611               | 3.094               | 3.293               | 6.732              | 10.879             | 3.680              | 2.753              | 1.745                              |
| NOV                | BC015028.1  | 2.350               | 2.653               | 2.452               | 2.706               | 9.453              | 3.014              | 2.700              | 2.461              | 1.735                              |
| USP4               | NM_003363.2 | 3.490               | 3.079               | 2.442               | 1.963               | 7.814              | 6.289              | 2.017              | 2.410              | 1.689                              |
| THEM5              | NM_182578.1 | 2.382               | 2.330               | 2.435               | 3.238               | 2.627              | 7.493              | 2.334              | 4.981              | 1.679                              |
| CYB5D1             | NM_144607.2 | 2.286               | 2.586               | 2.152               | 1.926               | 4.149              | 6.536              | 2.231              | 2.098              | 1.678                              |
| CCDC108            | BC047637.1  | 4.375               | 2.617               | 2.837               | 3.741               | 7.111              | 9.637              | 2.969              | 2.687              | 1.651                              |
| TOR1AIP2           | NM_022347.1 | 2.670               | 1.902               | 2.068               | 2.055               | 4.320              | 5.735              | 2.170              | 2.026              | 1.639                              |

| <b>Gene Symbol</b> | <b>ID</b>   | <b>w/o<br/>LNM1</b> | <b>w/o<br/>LNM2</b> | <b>w/o<br/>LNM3</b> | <b>w/o<br/>LNM4</b> | <b>w/<br/>LNM1</b> | <b>w/<br/>LNM2</b> | <b>w/<br/>LNM3</b> | <b>w/<br/>LNM4</b> | <b>FC<br/>(w/ LNM vs. w/o LNM)</b> |
|--------------------|-------------|---------------------|---------------------|---------------------|---------------------|--------------------|--------------------|--------------------|--------------------|------------------------------------|
| ARFGAP1            | NM_175609.1 | 2.345               | 3.509               | 4.008               | 3.072               | 2.854              | 7.041              | 8.616              | 2.360              | 1.614                              |
| CCT8               | NM_006585.2 | 2.819               | 3.266               | 2.939               | 2.627               | 2.646              | 6.129              | 7.406              | 2.509              | 1.604                              |
| TIMP4              | NM_003256.2 | 3.146               | 2.511               | 2.143               | 2.445               | 4.979              | 6.866              | 2.458              | 2.085              | 1.600                              |
| GYG2               | BC023152.1  | 3.271               | 3.288               | 2.551               | 3.272               | 10.209             | 4.594              | 2.573              | 2.389              | 1.596                              |
| TIMP1              | BC007097.1  | 3.213               | 2.252               | 2.151               | 2.316               | 4.336              | 7.380              | 2.095              | 1.954              | 1.587                              |
| PSMB8              | NM_004159.4 | 2.631               | 2.434               | 2.418               | 2.500               | 5.051              | 5.842              | 2.561              | 2.214              | 1.569                              |
| NIT1               | BC046149.1  | 2.972               | 2.303               | 2.867               | 3.144               | 5.182              | 7.079              | 2.872              | 2.500              | 1.562                              |
| ZFP91              | ZFP91       | 2.066               | 3.323               | 2.422               | 2.300               | 2.157              | 6.324              | 1.985              | 5.321              | 1.561                              |
| PLSCR3             | BC011735.2  | 2.633               | 2.478               | 2.361               | 2.778               | 4.524              | 6.461              | 2.555              | 2.297              | 1.545                              |
| NOTCH2NL           | NM_203458.2 | 2.191               | 2.507               | 2.318               | 2.071               | 4.075              | 5.856              | 1.986              | 2.109              | 1.544                              |
| NAP1L1             | NM_004537.3 | 2.142               | 2.437               | 3.386               | 4.028               | 2.926              | 5.156              | 8.357              | 2.040              | 1.541                              |
| GTF2E1             | NM_005513.2 | 1.798               | 1.710               | 2.029               | 1.959               | 3.582              | 1.678              | 4.219              | 1.912              | 1.520                              |
| SLC25A42           | NM_178526.1 | 3.218               | 2.271               | 2.389               | 2.383               | 5.185              | 5.845              | 2.262              | 2.296              | 1.519                              |
| GALK2              | NM_002044.2 | 2.430               | 2.275               | 2.112               | 2.331               | 5.111              | 4.338              | 2.282              | 2.095              | 1.511                              |
| Smarca2            | BC075641    | 1.647               | 1.456               | 1.786               | 2.396               | 1.697              | 3.576              | 3.814              | 1.845              | 1.501                              |
| PI4K2B             | BC051749.1  | 3.257               | 2.058               | 2.570               | 4.522               | 3.376              | 4.171              | 3.849              | 13.751             | 2.027                              |
| CAST               | NM_173060.2 | 3.593               | 27.277              | 3.064               | 11.025              | 24.898             | 17.410             | 28.864             | 11.162             | 1.831                              |
| PNMA2              | BC036489.1  | 3.799               | 4.311               | 10.668              | 3.954               | 4.728              | 6.842              | 22.827             | 4.372              | 1.705                              |
| ALDH1L1            | BC027241.1  | 2.897               | 3.516               | 2.370               | 2.370               | 2.666              | 9.551              | 3.405              | 3.117              | 1.680                              |
| BTN1A1             | BC096312.3  | 2.837               | 2.772               | 2.830               | 3.975               | 3.071              | 3.167              | 2.847              | 10.610             | 1.586                              |
| RDH10              | NM_172037.2 | 3.279               | 4.974               | 4.047               | 7.320               | 7.007              | 14.507             | 6.778              | 3.905              | 1.641                              |
| AAMP               | BC014122.2  | 3.888               | 8.933               | 3.799               | 169.080             | 3.204              | 3.768              | 3.386              | 3.703              | 0.076                              |
| PTPN12             | NM_002835.2 | 6.238               | 24.136              | 3.596               | 10.586              | 2.951              | 3.561              | 2.721              | 2.104              | 0.254                              |
| MUC15              | NM_145650.2 | 32.817              | 7.924               | 7.820               | 13.350              | 5.450              | 4.238              | 6.340              | 4.280              | 0.328                              |
| KIZ                | BC045826.1  | 33.612              | 10.431              | 8.035               | 7.782               | 2.949              | 7.085              | 6.717              | 4.475              | 0.355                              |
| SCG2               | BC022509.1  | 5.326               | 9.973               | 6.773               | 3.752               | 2.896              | 2.136              | 2.593              | 2.053              | 0.375                              |
| MARCKSL1           | BC066915.1  | 3.501               | 8.852               | 3.186               | 4.864               | 2.159              | 1.959              | 2.045              | 2.276              | 0.414                              |
| HSCB               | NM_172002.3 | 8.289               | 11.117              | 6.616               | 5.806               | 3.928              | 4.569              | 5.308              | 4.240              | 0.567                              |
| CAMKK1             | NM_032294.2 | 3.114               | 6.604               | 4.862               | 3.212               | 2.406              | 2.709              | 2.542              | 2.510              | 0.571                              |
| OXR1               | BC032710    | 4.626               | 5.683               | 2.914               | 2.902               | 1.657              | 1.601              | 1.885              | 1.828              | 0.432                              |
| LYSMD4             | BC084545.1  | 8.052               | 8.318               | 4.808               | 16.981              | 3.919              | 4.016              | 3.274              | 5.438              | 0.436                              |

| <b>Gene Symbol</b> | <b>ID</b>       | <b>w/o<br/>LNM1</b> | <b>w/o<br/>LNM2</b> | <b>w/o<br/>LNM3</b> | <b>w/o<br/>LNM4</b> | <b>w/<br/>LNM1</b> | <b>w/<br/>LNM2</b> | <b>w/<br/>LNM3</b> | <b>w/<br/>LNM4</b> | <b>FC<br/>(w/ LNM vs. w/o LNM)</b> |
|--------------------|-----------------|---------------------|---------------------|---------------------|---------------------|--------------------|--------------------|--------------------|--------------------|------------------------------------|
| CAAP1              | NM_024828.2     | 5.035               | 6.272               | 6.867               | 4.523               | 1.995              | 2.238              | 2.857              | 4.592              | 0.515                              |
| ZNF330             | NM_014487.2     | 7.278               | 4.364               | 3.035               | 2.461               | 2.317              | 2.699              | 2.264              | 2.165              | 0.551                              |
| PRMT3              | PRMT3           | 4.336               | 5.208               | 2.437               | 3.227               | 2.137              | 2.592              | 2.237              | 2.133              | 0.598                              |
| LDLRAD4            | NM_181481.2     | 6.977               | 3.913               | 3.256               | 4.948               | 3.774              | 2.519              | 2.867              | 2.772              | 0.625                              |
| LIX1               | NM_153234.3     | 6.069               | 3.520               | 2.986               | 5.245               | 2.941              | 3.052              | 2.802              | 2.469              | 0.632                              |
| FAM129B            | BC067366.1      | 3.530               | 7.679               | 2.699               | 91.764              | 3.088              | 3.027              | 2.821              | 2.714              | 0.110                              |
| STXBP4             | ENST00000299341 | 48.487              | 3.125               | 6.144               | 26.705              | 3.489              | 3.767              | 3.994              | 3.072              | 0.170                              |
| DUSP14             | NM_007026.1     | 12.669              | 1.759               | 10.084              | 7.024               | 2.344              | 2.372              | 2.003              | 1.961              | 0.275                              |
| PTGES3L-<br>AARSD1 | NM_025267.2     | 4.961               | 22.644              | 4.535               | 16.902              | 4.584              | 3.457              | 4.534              | 2.234              | 0.302                              |
| SNX1               | NM_003099.3     | 2.054               | 8.848               | 21.533              | 12.537              | 4.678              | 3.603              | 2.770              | 5.323              | 0.364                              |
| NUDT16             | BC031215.1      | 16.311              | 4.590               | 6.879               | 2.680               | 2.767              | 3.931              | 2.812              | 3.180              | 0.417                              |
| HDGFL1             | NM_138574.2     | 16.138              | 4.974               | 5.181               | 2.032               | 3.244              | 3.220              | 2.096              | 4.190              | 0.450                              |
| NBPF22P            | BC050328.1      | 12.332              | 3.691               | 4.231               | 2.537               | 2.837              | 3.168              | 2.478              | 2.748              | 0.493                              |
| SOX6               | BC047064.1      | 12.607              | 4.235               | 5.346               | 2.373               | 3.082              | 3.746              | 2.954              | 3.072              | 0.523                              |
| ZKSCAN8            | BC096284.3      | 7.485               | 3.087               | 5.920               | 2.348               | 2.071              | 2.537              | 2.577              | 2.826              | 0.531                              |
| CTAG1A             | NM_139250       | 4.134               | 3.829               | 9.575               | 2.578               | 3.074              | 2.940              | 2.293              | 2.528              | 0.539                              |
| STARD4             | NM_139164.1     | 2.116               | 4.794               | 6.163               | 3.963               | 2.580              | 2.923              | 2.441              | 2.043              | 0.586                              |
| UBA5               | NM_024818.2     | 4.974               | 2.280               | 5.308               | 3.628               | 1.984              | 2.983              | 2.697              | 1.985              | 0.596                              |
| ITGB8              | NM_002214.2     | 7.755               | 7.231               | 3.454               | 7.831               | 3.622              | 5.045              | 4.792              | 2.821              | 0.620                              |
| ACSBG1             | BC009289.2      | 4.849               | 3.027               | 6.854               | 4.525               | 3.197              | 3.080              | 2.906              | 3.047              | 0.635                              |
| PROL1              | NM_021225.4     | 10.474              | 8.234               | 3.951               | 8.716               | 3.911              | 6.482              | 5.514              | 4.074              | 0.637                              |
| CD69               | NM_001781.1     | 3.746               | 3.438               | 3.051               | 8.427               | 2.801              | 3.044              | 3.150              | 3.074              | 0.647                              |
| MUC3A              | XM_003846410.1  | 4.772               | 5.452               | 2.552               | 6.167               | 3.000              | 3.391              | 2.700              | 3.261              | 0.652                              |
| DEFB118            | DEFB118         | 3.342               | 2.136               | 7.412               | 2.796               | 1.984              | 1.945              | 2.280              | 2.073              | 0.528                              |
| EIF4EBP1           | NM_004095.2     | 2.075               | 4.951               | 2.775               | 4.633               | 1.865              | 2.206              | 1.917              | 1.915              | 0.548                              |
| C10orf118          | BC030557.1      | 11.483              | 5.523               | 7.185               | 5.390               | 2.412              | 6.570              | 2.982              | 4.234              | 0.548                              |
| HELQ               | BC011863.2      | 2.072               | 2.628               | 3.233               | 27.679              | 2.431              | 2.417              | 2.207              | 2.255              | 0.261                              |
| MUC20              | BC029267.1      | 2.718               | 7.902               | 2.154               | 3.091               | 2.050              | 2.329              | 2.173              | 2.053              | 0.542                              |
| WBP11              | NM_016312.2     | 1.859               | 2.642               | 5.436               | 4.431               | 2.013              | 2.235              | 2.193              | 1.840              | 0.576                              |
| FARSB              | BC017783.1      | 4.103               | 1.878               | 2.395               | 4.815               | 1.945              | 2.174              | 1.978              | 2.027              | 0.616                              |

| <b>Gene Symbol</b> | <b>ID</b>      | <b>w/o<br/>LNM1</b> | <b>w/o<br/>LNM2</b> | <b>w/o<br/>LNM3</b> | <b>w/o<br/>LNM4</b> | <b>w/<br/>LNM1</b> | <b>w/<br/>LNM2</b> | <b>w/<br/>LNM3</b> | <b>w/<br/>LNM4</b> | <b>FC<br/>(w/ LNM vs. w/o LNM)</b> |
|--------------------|----------------|---------------------|---------------------|---------------------|---------------------|--------------------|--------------------|--------------------|--------------------|------------------------------------|
| IL1RAPL1           | BC111918       | 3.071               | 5.654               | 2.152               | 2.610               | 1.965              | 2.332              | 2.336              | 2.246              | 0.658                              |
| MBLAC1             | BC031288.1     | 15.081              | 4.514               | 2.352               | 3.530               | 3.316              | 2.749              | 2.277              | 2.185              | 0.413                              |
| FAM131C            | BC016848.1     | 29.561              | 20.685              | 6.045               | 10.244              | 5.840              | 9.755              | 5.514              | 7.143              | 0.425                              |
| PRH2               | BC095488.1     | 3.443               | 20.109              | 5.040               | 5.249               | 3.560              | 4.865              | 3.614              | 4.035              | 0.475                              |
| PUS7L              | NM_031292.2    | 2.538               | 5.529               | 17.142              | 6.228               | 4.654              | 3.944              | 5.020              | 2.916              | 0.526                              |
| RNF157             | NM_052916      | 4.932               | 2.568               | 7.887               | 9.696               | 3.427              | 4.366              | 3.497              | 2.304              | 0.542                              |
| NUDT5              | NM_014142.2    | 5.984               | 9.041               | 2.866               | 4.359               | 4.092              | 3.559              | 3.032              | 3.432              | 0.634                              |
| FNIP2              | NM_020840      | 3.761               | 4.325               | 11.415              | 2.554               | 3.630              | 2.924              | 2.219              | 3.656              | 0.564                              |
| ECI2               | NM_206836.1    | 3.777               | 8.742               | 2.461               | 3.521               | 2.699              | 3.304              | 2.703              | 3.306              | 0.649                              |
| SMYD3              | NM_022743.1    | 40.768              | 8.023               | 117.115             | 5.686               | 3.988              | 3.495              | 30.180             | 4.788              | 0.247                              |
| ZNF671             | BC025728.1     | 20.974              | 3.707               | 2.916               | 14.436              | 2.804              | 4.035              | 3.005              | 2.567              | 0.295                              |
| PRRT2              | BC053594.1     | 7.303               | 13.377              | 5.520               | 34.697              | 8.575              | 4.580              | 4.496              | 5.671              | 0.383                              |
| SOX9               | NM_000346.2    | 5.580               | 11.610              | 2.366               | 2.198               | 2.138              | 2.249              | 2.677              | 2.021              | 0.418                              |
| ANP32A             | BC007200.1     | 6.028               | 12.652              | 19.702              | 4.972               | 11.047             | 3.214              | 2.357              | 3.041              | 0.453                              |
| CSF1               | NM_000757.3    | 14.558              | 4.533               | 4.173               | 6.838               | 4.442              | 3.412              | 4.648              | 3.600              | 0.535                              |
| VPS4B              | NM_004869.3    | 2.225               | 3.129               | 2.402               | 7.374               | 2.437              | 2.101              | 1.996              | 2.325              | 0.586                              |
| SPN                | NM_003123.3    | 124.525             | 5.833               | 33.592              | 75.512              | 17.279             | 6.897              | 35.109             | 8.557              | 0.283                              |
| PRRG1              | NM_000950.1    | 25.662              | 2.411               | 6.301               | 16.459              | 3.290              | 2.726              | 7.384              | 4.204              | 0.346                              |
| BCL7B              | NM_138707.1    | 2.393               | 6.291               | 5.620               | 2.223               | 2.135              | 2.252              | 2.231              | 2.405              | 0.546                              |
| TMEM129            | NM_138385.2    | 4.593               | 6.646               | 2.598               | 1.932               | 2.600              | 2.119              | 1.851              | 2.104              | 0.550                              |
| G3BP2              | NM_203504.1    | 2.316               | 2.086               | 4.802               | 5.854               | 2.212              | 2.295              | 2.114              | 1.917              | 0.567                              |
| PRLR               | NM_000949.2    | 6.272               | 2.287               | 2.881               | 5.283               | 2.372              | 2.029              | 2.706              | 2.759              | 0.590                              |
| LETM1              | NM_012318.1    | 6.439               | 4.961               | 1.945               | 3.057               | 3.198              | 1.942              | 2.207              | 2.458              | 0.598                              |
| FAM153A            | NM_173663.1    | 22.058              | 104.620             | 1.887               | 2.751               | 4.450              | 3.433              | 3.146              | 2.981              | 0.107                              |
| PPM1B              | NM_177968.2    | 34.139              | 4.098               | 1.993               | 2.024               | 2.123              | 2.017              | 3.017              | 2.071              | 0.218                              |
| Supt6              | BC072657       | 65.696              | 12.241              | 88.074              | 2.035               | 8.328              | 5.776              | 19.507             | 9.165              | 0.255                              |
| PAF1               | NM_019088.2    | 24.333              | 29.831              | 3.972               | 4.194               | 3.183              | 4.144              | 3.815              | 4.849              | 0.257                              |
| ZYX                | NM_001010972.1 | 7.688               | 14.668              | 2.000               | 2.005               | 2.140              | 2.417              | 2.641              | 1.937              | 0.347                              |
| WASL               | NM_003941.2    | 4.225               | 19.888              | 1.899               | 2.909               | 1.877              | 3.229              | 2.739              | 2.322              | 0.352                              |
| ATF6               | BC014969.1     | 26.634              | 16.387              | 2.167               | 3.648               | 6.683              | 6.242              | 2.648              | 2.070              | 0.361                              |
| C14orf37           | NM_001001872.2 | 50.621              | 2.608               | 8.143               | 23.309              | 5.915              | 4.332              | 12.687             | 7.926              | 0.364                              |

| <b>Gene Symbol</b> | <b>ID</b>       | <b>w/o<br/>LNM1</b> | <b>w/o<br/>LNM2</b> | <b>w/o<br/>LNM3</b> | <b>w/o<br/>LNM4</b> | <b>w/<br/>LNM1</b> | <b>w/<br/>LNM2</b> | <b>w/<br/>LNM3</b> | <b>w/<br/>LNM4</b> | <b>FC<br/>(w/ LNM vs. w/o LNM)</b> |
|--------------------|-----------------|---------------------|---------------------|---------------------|---------------------|--------------------|--------------------|--------------------|--------------------|------------------------------------|
| PMEPA1             | NM_199169.1     | 183.083             | 15.470              | 46.774              | 169.545             | 36.225             | 16.209             | 76.911             | 31.066             | 0.387                              |
| GBP5               | NM_052942.2     | 3.861               | 28.221              | 3.009               | 42.038              | 5.435              | 8.200              | 13.848             | 2.672              | 0.391                              |
| JUNB               | NM_002229.2     | 322.623             | 135.141             | 6.261               | 78.915              | 3.338              | 101.945            | 88.959             | 37.469             | 0.427                              |
| FAM53C             | NM_016605.1     | 9.292               | 11.589              | 1.855               | 2.019               | 4.283              | 2.237              | 2.215              | 2.028              | 0.435                              |
| PPP1R13L           | BC064913.1      | 12.552              | 19.951              | 2.481               | 3.376               | 2.699              | 4.196              | 7.853              | 2.527              | 0.450                              |
| SLX4               | BC036335.1      | 3.694               | 12.561              | 1.842               | 2.208               | 2.550              | 2.250              | 2.478              | 1.925              | 0.453                              |
| ELL3               | NM_025165.2     | 7.060               | 24.159              | 9.671               | 31.006              | 6.293              | 10.301             | 12.475             | 3.864              | 0.458                              |
| RSC1A1             | NM_006511.1     | 4.308               | 1.744               | 1.813               | 8.386               | 1.843              | 1.692              | 2.035              | 1.902              | 0.460                              |
| PRRG2              | NM_000951.1     | 14.001              | 2.201               | 3.318               | 5.912               | 3.697              | 2.305              | 3.544              | 2.350              | 0.468                              |
| PPRC1              | BC063829        | 6.834               | 2.511               | 12.124              | 1.903               | 2.887              | 3.103              | 2.671              | 2.364              | 0.472                              |
| HIP1               | NM_005338.4     | 5.283               | 1.757               | 2.031               | 8.156               | 1.809              | 1.984              | 2.233              | 2.281              | 0.482                              |
| STAT4              | BC031212.1      | 8.918               | 9.600               | 2.584               | 3.231               | 2.778              | 3.664              | 2.596              | 2.970              | 0.493                              |
| SORBS2             | NM_021069.3     | 9.641               | 4.761               | 1.854               | 2.392               | 1.680              | 2.751              | 2.682              | 2.152              | 0.497                              |
| LIME1              | BC017016.1      | 8.276               | 1.614               | 2.338               | 3.824               | 1.904              | 1.841              | 2.255              | 2.279              | 0.516                              |
| CXCR3              | NM_001504.1     | 9.759               | 4.783               | 2.161               | 2.427               | 2.712              | 2.733              | 2.218              | 2.238              | 0.518                              |
| GPBP1              | BC000267.1      | 21.078              | 16.018              | 2.341               | 1.936               | 4.241              | 2.901              | 5.411              | 9.109              | 0.524                              |
| NLN                | BC004985.1      | 6.160               | 14.820              | 3.027               | 3.900               | 3.328              | 3.935              | 4.181              | 3.221              | 0.525                              |
| ERVFRD-1           | BC068585.1      | 2.225               | 3.682               | 3.482               | 13.833              | 2.949              | 3.387              | 3.552              | 2.670              | 0.541                              |
| EPB41              | BC039079.1      | 29.499              | 6.088               | 28.011              | 3.975               | 13.705             | 16.960             | 3.105              | 2.883              | 0.542                              |
| DDX19A             | NM_018332.3     | 3.938               | 11.695              | 4.023               | 11.234              | 4.414              | 4.213              | 4.992              | 3.171              | 0.544                              |
| BAALCOS            | ENST00000436771 | 5.905               | 13.771              | 3.352               | 3.730               | 3.042              | 4.011              | 3.984              | 3.656              | 0.549                              |
| KDM5A              | JARID1A         | 1.684               | 4.246               | 2.030               | 5.415               | 1.810              | 1.961              | 1.840              | 2.009              | 0.570                              |
| ZFYVE27            | NM_001002262.1  | 3.949               | 1.622               | 6.188               | 1.951               | 1.871              | 2.207              | 1.987              | 1.994              | 0.588                              |
| ZDHHC9             | NM_001008222.1  | 5.410               | 10.762              | 2.834               | 3.791               | 4.086              | 3.758              | 3.230              | 2.998              | 0.617                              |
| CDH13              | NM_001257.3     | 7.039               | 1.718               | 2.508               | 4.234               | 1.981              | 1.945              | 3.082              | 2.660              | 0.624                              |
| PIIP5K1            | BC050263.1      | 2.041               | 3.017               | 6.476               | 2.006               | 2.103              | 2.462              | 1.961              | 1.929              | 0.624                              |
| DENND1C            | NM_024898.2     | 2.152               | 2.234               | 5.929               | 4.172               | 2.250              | 2.399              | 2.360              | 2.079              | 0.627                              |
| TEX12              | NM_031275.3     | 4.372               | 8.070               | 2.661               | 2.778               | 2.865              | 3.264              | 2.563              | 2.562              | 0.629                              |
| ECE1               | NM_001397.1     | 12.688              | 40.114              | 10.232              | 41.741              | 23.866             | 18.181             | 11.913             | 12.518             | 0.634                              |
| FSCN1              | BC006304.2      | 3.808               | 9.009               | 2.432               | 2.962               | 2.690              | 3.046              | 3.118              | 2.733              | 0.636                              |
| KDM4C              | JMJD2C          | 7.591               | 6.260               | 2.152               | 2.674               | 4.266              | 4.022              | 1.991              | 2.071              | 0.661                              |

| <b>Gene Symbol</b> | <b>ID</b>      | <b>w/o<br/>LNM1</b> | <b>w/o<br/>LNM2</b> | <b>w/o<br/>LNM3</b> | <b>w/o<br/>LNM4</b> | <b>w/<br/>LNM1</b> | <b>w/<br/>LNM2</b> | <b>w/<br/>LNM3</b> | <b>w/<br/>LNM4</b> | <b>FC<br/>(w/ LNM vs. w/o LNM)</b> |
|--------------------|----------------|---------------------|---------------------|---------------------|---------------------|--------------------|--------------------|--------------------|--------------------|------------------------------------|
| LRP10              | NM_014045.3    | 8.245               | 2.727               | 2.839               | 4.426               | 2.953              | 2.676              | 3.487              | 3.036              | 0.666                              |
| RTN4               | NM_207521.1    | 7.922               | 50.283              | 5.132               | 5.358               | 5.643              | 12.610             | 2.350              | 2.979              | 0.343                              |
| PRKAR2B            | BC075800.1     | 3.503               | 52.329              | 20.679              | 4.053               | 22.414             | 4.262              | 2.629              | 2.621              | 0.396                              |
| ERBB4              | NM_001042599.1 | 6.751               | 6.294               | 29.899              | 3.769               | 3.253              | 12.651             | 3.555              | 3.263              | 0.486                              |
| PRKCZ              | NM_002744.4    | 3.271               | 5.946               | 32.239              | 3.128               | 2.874              | 2.907              | 14.126             | 3.165              | 0.518                              |
| BZW2               | NM_014038.1    | 4.220               | 8.618               | 3.662               | 4.702               | 3.516              | 4.717              | 3.262              | 2.431              | 0.657                              |
| PALM2              | NM_001037293.1 | 29.660              | 35.582              | 3.811               | 45.031              | 41.168             | 8.780              | 6.586              | 5.157              | 0.541                              |

**Supplementary Table S7.** The 41 overlapped tumor-related IgG autoantibodies in T1-stage ESCC with LNM compared with those without LNM

| <b>Gene Symbol</b> | <b>Protein location</b>                 | <b>FC (w/ LNM vs. w/o LNM)</b> | <b>Sensitivity</b> | <b>Specificity</b> |
|--------------------|-----------------------------------------|--------------------------------|--------------------|--------------------|
| BACH1              | nucleus/cytoplasm/cytosol               | 4.00                           | 1                  | 1                  |
| PODNL1             | cytoplasm                               | 1.84                           | 0.75               | 1                  |
| ERBB4              | Nucleus/Mitochondrion                   | 2.06                           | 0.5                | 0                  |
| FAM84A             | nucleus/nucleoplasm                     | 2.33                           | 0.5                | 1                  |
| PTGES3L-AARSD1     | Nuclear membrane/Cytosol                | 3.31                           | 0.25               | 0.25               |
| FAM153A            | nucleus/cytosol                         | 9.37                           | 0.25               | 0.5                |
| ATF6               | nucleus                                 | 2.77                           | 0.25               | 0.5                |
| IVNS1ABP           | nucleoplasm                             | 3.25                           | 0.75               | 1                  |
| MPPED2             | nucleoli/vesicles/mitochondria          | 2.02                           | 0.5                | 1                  |
| PPP1R13L           | Cytosol                                 | 2.22                           | 0.25               | 0.5                |
| CTAG1A             | plasma membrane/cytosol/nucleus         | 1.86                           | 0.25               | 0.25               |
| MARCKSL1           | nucleus/cytosol                         | 2.42                           | 1                  | 0                  |
| BTN1A1             | predicted membrane proteins             | 1.59                           | 0.75               | 0.75               |
| MAGEA2             | nucleus                                 | 1.72                           | 0.5                | 1                  |
| SNX1               | Endosomes/Lysosomes                     | 2.75                           | 0.25               | 0.25               |
| ZPR1               | nucleolus/nucleoplasm/nucleus/cytoplasm | 3.19                           | 0.5                | 1                  |
| TPM2               | cytosol                                 | 2.41                           | 0.5                | 1                  |
| PSMA3              | nucleoplasm/nucleus/cytoplasm/cytosol   | 6.16                           | 0.5                | 1                  |
| PNMA2              | nucleolus                               | 1.71                           | 1                  | 0.75               |
| CRYL1              | nucleolus/nucleus/cytoplasm/cytosol     | 2.36                           | 0.5                | 1                  |
| FAM131C            | Nucleoli/Intermediate filaments/Cytosol | 2.36                           | 0                  | 0.5                |
| SPDL1              | nucleus/cytosol                         | 2.43                           | 0.5                | 1                  |
| ATXN3              | nucleoplasm/nucleus/cytoplasm/cytosol   | 3.24                           | 0.5                | 1                  |
| PAGE5              | cytoplasm                               | 4.94                           | 0.75               | 1                  |
| C1orf94            | nucleoplasm/cytosol                     | 5.43                           | 0.5                | 1                  |
| PAGE2              | predicted intracellular proteins        | 2.87                           | 0.5                | 1                  |
| ITGB8              | Plasma membrane/Cytosol                 | 1.61                           | 0.25               | 0.25               |
| TOM1               | cytoplasm/cytosol                       | 2.93                           | 0.5                | 1                  |
| GBP5               | golgi apparatus/endoplasmic reticuium   | 2.56                           | 0.25               | 0.5                |
| GPI                | nucleoplasm/cytoplasm/cytosol           | 1.99                           | 0.75               | 1                  |
| MED22              | cytoplasm                               | 1.88                           | 0.5                | 1                  |



| <b>Gene Symbol</b> | <b>Protein location</b>                    | <b>FC (w/ LNM vs. w/o LNM)</b> | <b>Sensitivity</b> | <b>Specificity</b> |
|--------------------|--------------------------------------------|--------------------------------|--------------------|--------------------|
| ZSCAN20            | nucleus                                    | 1.73                           | 0.5                | 1                  |
| SESN2              | nucleus/cytoplasm/cytosol                  | 1.88                           | 0.75               | 1                  |
| PALM2              | Nucleoplasm/Nuclear bodies/Plasma membrane | 1.85                           | 0.5                | 0.25               |
| PI4K2B             | cytoplasm/cytosol                          | 2.03                           | 1                  | 0.75               |
| USH1C              | cytoplasm/cytosol                          | 2.2                            | 0.5                | 1                  |
| SPA17              | cytoplasm                                  | 2.58                           | 0.75               | 1                  |
| KRTAP19-3          | cytosol                                    | 2.8                            | 0.5                | 1                  |
| TRIM55             | nucleus/cytoplasm                          | 1.87                           | 0.5                | 1                  |
| PROL1              | extracellular/plasma membrane/cytosol      | 1.57                           | 0.25               | 0.25               |
| THUMPD1            | nucleoplasm                                | 23.34                          | 0.75               | 1                  |
